1           **RNPP-type quorum sensing regulates solvent formation and sporulation**

2                               **in *Clostridium acetobutylicum***

3

4

5   Running title: RNPP-type Quorum sensing in *C. acetobutylicum*

6

7   Ann-Kathrin Kotte, Oliver Severn, Zak Bean, Katrin Schwarz, Nigel P. Minton, and Klaus

8   Winzer\*

9

10   BBSRC/EPSRC Synthetic Biology Research Centre (SBRC), School of Life Sciences,

11   University Park, The University of Nottingham, Nottingham, United Kingdom

12

13

14   \*Corresponding author:

15   Email: [klaus.winzer@nottingham.ac.uk](mailto:klaus.winzer@nottingham.ac.uk)

16   Tel: +44 (0)115 82 32247

17   Fax: +44 (0)115 823 2120

18

1 **ABSTRACT**

2 The strictly anaerobic bacterium *Clostridium acetobutylicum* is well known for its ability to  
3 convert sugars into acids and solvents, most notably the potential biofuel butanol. However,  
4 the regulation of its fermentation metabolism, in particular the shift from acid to solvent  
5 production, remains poorly understood. The aim of this study was to investigate whether cell-  
6 cell communication plays a role in controlling the timing of this shift or the extent of solvent  
7 formation. Analysis of the available *C. acetobutylicum* genome sequences revealed the  
8 presence of eight putative RNPP-type quorum sensing systems, here designated *qssA* to *qssH*,  
9 each consisting of RNPP-type regulator gene followed by a small open reading frame  
10 encoding a putative signalling peptide precursor. The identified regulator and signal peptide  
11 precursor genes were designated *qsrA* to *qsrH* and *qspA* to *qspH*, respectively. Triplicate  
12 mutants were generated for each system in *C. acetobutylicum* ATCC 824 and screened for  
13 phenotypic changes. Endospores counts after 7 days were only affected in the *qsrG*-deficient  
14 strains, whereas solvent formation was affected in all mutants with the exception of the *qsrD*-  
15 deficient strains. The *qsrB* mutants were of particular interest as they showed increased  
16 solvent formation during early solventogenesis. Overexpression of *qsrB* considerably reduced  
17 solvent and endospore formation, suggesting that it acts as a repressor. Addition of short  
18 synthetic peptides representing internal fragments of QspB counteracted QsrB-mediated  
19 repression and restored both solvent production and sporulation. Together, these findings  
20 support the hypothesis that QssB is a functional quorum sensing system involved in the  
21 regulation of early solventogenesis and sporulation.

22

23

## 1 **IMPORTANCE**

2 While quorum sensing has been studied in great detail in pathogenic bacteria, there is a  
3 dearth of information concerning its roles in industrially relevant organisms. Yet, these roles  
4 could be highly relevant given that industrial fermentations are usually carried out at high  
5 cell densities where such systems would be expected to be active. Here we show that  
6 peptide-based signalling regulates solvent formation and sporulation in the butanol-  
7 producing bacterium *Clostridium acetobutylicum*. Our work sheds light on a pivotal  
8 biological phenomenon, the metabolic shift from acid to solvent fermentation and its link to  
9 sporulation. This shift and its regulation have been a focus of clostridial research for over  
10 three decades but remain little understood. The discovery that quorum sensing is a  
11 contributing factor has implications for other solvent-producing species of the genus and  
12 beyond.

13

## 14 **INTRODUCTION**

15 The strictly anaerobic bacterium *Clostridium acetobutylicum* is well known for its ability to  
16 convert sugars and starches into organic acids and solvents (1, 2). During the first half of the  
17 last century, the organism was used for the large scale industrial production of acetone and  
18 butanol, but the classical ABE (acetone-butanol-ethanol) fermentation process is not currently  
19 economically viable (3). Thus, considerable efforts have been devoted to improving the  
20 organism's performance through metabolic engineering. However, decisive breakthroughs are  
21 still to be made, one reason being our limited understanding of the organism's physiology and  
22 metabolism (4), in particular the mechanisms that govern timing and extent of solvent  
23 formation.

1 In a typical *C. acetobutylicum* batch culture, acid and solvent metabolism are associated with  
2 different growth phases. During the exponential phase, a typical butyrate fermentation is  
3 carried out which allows the bacterium to maximise ATP generation. At this stage, butyric and  
4 acetic acid, as well as hydrogen and carbon dioxide, are the main fermentation products, with  
5 the former two accumulating in the culture medium. However, the increasing concentration of  
6 these short chain fatty acids poses a problem for the cells as the pH of the medium decreases  
7 and un-dissociated acids diffuse back into the cells. To avoid collapse of the proton motive  
8 force, *C. acetobutylicum* shifts its metabolism to solvent formation. In batch culture, this shift  
9 usually occurs during the transition to stationary phase and is accompanied by the partial  
10 uptake of the previously produced acids, resulting in a pH increase. These acids, together with  
11 the remaining sugars, are then converted to butanol, acetone, and ethanol (1, 2). However,  
12 solvents at high concentrations, in particular butanol, are toxic to the cells, too. The metabolic  
13 switch to solvent formation therefore leads to the initiation of yet another survival strategy: the  
14 formation of heat-resistant endospores. After solvent formation has been initiated and after  
15 cells have entered stationary phase, an intracellular starch-like storage compound termed  
16 granulose is transitorily formed and accumulates in the cytoplasm (2). Early studies suggested  
17 that these granulose-containing, swollen ‘clostridial forms’ are the main solvent producing  
18 cells, but this view has recently been challenged for the ATCC 824 strain (5).

19 The regulatory mechanisms that govern acid and solvent metabolism, as well as sporulation,  
20 are subject to intensive research. The global transcriptional regulator Spo0A is known to be  
21 required for high solvent production in solventogenic *Clostridium* sp. and is also essential for  
22 the initiation of sporulation (6, 7). Although solvent formation in *spoA* mutants is still induced  
23 during the transition to stationary phase, the levels of acetone and butanol produced are

1 drastically reduced (7, 8). Other regulators implied in the regulation of solventogenesis are the  
2 global regulator CodY, a small regulatory RNA, *solB*, and the catabolite control protein A (9-  
3 11). The latter was shown to positively regulate the *sol* operon, which encodes key genes  
4 required for acetone and butanol formation.

5 Presumably, transcription of several solvent genes is strongly activated by the binding of  
6 phosphorylated Spo0A to specific sites, 0A boxes, which are present in the promoter regions  
7 of these genes (7, 8) Responsible for the Spo0A phosphorylation state are three orphan  
8 histidine kinases as well as an intracellular kinase-like protein which, however, acts as a  
9 phosphatase (12). Unfortunately, none of the signals or cues activating or inhibiting these  
10 proteins is currently known, although intracellular accumulation of butyrylphosphate has been  
11 proposed as a possible physiological signal and Spo0A phosphodonor (13). So while the  
12 general conditions for solventogenesis are well established, and considerable progress has  
13 been made in unravelling at least some of the regulatory networks involved, we are still  
14 largely ignorant of the cues and signals which ultimately control initiation and extent of  
15 solvent formation, and of the pathways through which they mediate their effects.

16 We recently proposed that quorum sensing systems may be operational in *C. acetobutylicum*  
17 and may play a role in regulating solvent metabolism (14). Quorum sensing is a mechanism of  
18 cell-cell communication that relies on small, diffusible signal molecules often referred to as  
19 autoinducers. These molecules are secreted during growth, accumulate in the extracellular  
20 environment, and allow bacteria to coordinate gene expression with cell population density. In  
21 the *Firmicutes*, quorum sensing systems are usually based on secreted autoinducing peptides  
22 (AIPs) which can be linear or cyclic, and sometimes contain post-translational modifications  
23 (15, 16). Relatively little is known about the operation of such systems in clostridial species,

1 but we have previously hypothesised (14) that quorum sensing might play a role in the  
2 regulation of solventogenesis based on the following considerations. First, for the  
3 solventogenic *Clostridium sacharoperbutylaceticum* an as yet unidentified, self-generated  
4 signal present in the supernatant of wild type cultures was capable of inducing solvent  
5 formation in a ‘low-solvent’ mutant (17). Second, in *C. acetobutylicum* and related “high  
6 solvent” producers such as *Clostridium beijerinckii*, solventogenesis during batch culture  
7 growth is usually initiated at high cell densities. Third, genome sequencing has revealed a  
8 large number of putative quorum sensing systems within the Genus *Clostridium*, including all  
9 currently sequenced solvent-producing species (18; and unpublished data from this  
10 laboratory).

11 We therefore investigated the role of a putative *agr*-type quorum sensing system in *C.*  
12 *acetobutylicum* ATCC 824, which we showed to be functional and involved in the regulation  
13 of sporulation and the production of granulose (14). However, the formation of organic acids  
14 and solvents from glucose was unaffected in mutants in which this system had been  
15 inactivated, suggesting that it played no role in the regulation of fermentation metabolism.  
16 Interestingly, however, the *C. acetobutylicum* genome has also been reported to contain two  
17 potential quorum sensing systems which bear similarity to the *rap-phr* systems present in  
18 *Bacillus subtilis* (19). In *Bacillus subtilis*, the *rap* genes encode a conserved group of  
19 regulatory phosphatases acting on phosphorylated response regulators, whereas the *phr* genes  
20 encode the precursors of short, linear signalling peptides which can bind to and inhibit the Rap  
21 proteins. The Rap proteins are part of the RNPP-type family of quorum sensing regulators,  
22 which derived its name from its best studied members, i.e. Rap, NprR, PlcR, and PrgX, and is  
23 characterised by the presence of tetratricopeptide repeat (TPR) domains responsible for

1 promoting protein-protein interaction. The family comprises all currently known Gram-  
2 positive cytoplasmic quorum sensing regulators which directly bind to their cognate signalling  
3 peptide (20, 21). The signalling peptide is derived from the C-terminal part of the original pre-  
4 pro peptide which is exported and further processed to its mature form. The mature signalling  
5 peptide is transported back into the cells by oligopeptide permeases belonging to the family of  
6 ATP-binding cassette (ABC) transporters. Thus, the uptake of these signalling molecules is an  
7 ATP-consuming process (19). Apart from the Rap proteins, all other currently identified  
8 RNPP-type regulators, including the two proposed *C. acetobutylicum* homologues (CA\_C186  
9 and CA\_C3694), possess helix-turn-helix (HTH) motifs and are either known or likely to be  
10 transcriptional regulators which become activated or inhibited upon binding their cognate  
11 signal peptide (21).

12 Here, we report the discovery and mutational analysis of eight putative RNPP-type quorum  
13 sensing systems in *C. acetobutylicum* ATCC 824.

14

## 1 RESULTS

### 2 Identification of eight putative RNPP-type quorum sensing systems in *C. acetobutylicum*.

3 Using the two previously identified *C. acetobutylicum* homologues (19) and other  
4 experimentally confirmed HTH-containing RNPP-type regulators such as PlcR and NprR in  
5 blastp searches, a total of eleven putative RNPP-type regulators genes were identified in the  
6 published *C. acetobutylicum* genomes (strains ATCC 824, DSM 1731, and EA 2018). The  
7 locus tags for these genes in the ATCC 824 strain were CA\_C0186, CA\_C0324, CA\_C0957,  
8 CA\_C0958, CA\_C1043, CA\_C1214, CA\_C1949, CA\_C2490, CA\_C3694, CA\_P0040 and  
9 CA\_P0149. Most of them were annotated as either hypothetical proteins or regulators of the  
10 Xre family containing TPR domains, with CA\_C0186 and CA\_C3694 representing the  
11 previously identified homologues (19). In the current version of the ATCC 824 genome (NC-  
12 \_003030.1), CA\_C3694 is annotated as a pseudogene in which the HTH motif and TPR  
13 domain-encoding parts of an RNPP-type regulator are separated by a stop codon. However, in  
14 the genomes of the DSM1731 and EA 2018 strains, these domains are encoded by a single  
15 gene. We therefore compared the published ATCC 824 sequence to that obtained for our  
16 version of this strain (unpublished) and also found the two domains to be encoded by a single  
17 gene. In the published ATCC 824 sequence, the insertion of a guanine at position 357 had  
18 shifted the reading frame so that a stop codon appeared to terminate CA\_C3694 translation  
19 after 360 bp. The corrected sequence was identical to that in the EA2018 and DSM 1731  
20 strains (22, 23).

21 To establish a putative role in quorum sensing, the regions flanking the above regulator genes  
22 were analysed for the presence of short ORFs encoding putative quorum sensing peptide  
23 precursors. For established RNPP-type systems, these precursors consist of a positively



1 charged N-terminus, followed by a hydrophobic region (together forming a signal peptide  
2 sequence, required for peptide export) and a C-terminal part containing the actual  
3 autoinducing peptide (19). Short ORFs fulfilling the above criteria could be identified  
4 downstream of the CA\_C0186, CA\_C0324, CA\_C1043, CA\_C1214, CA\_C2490,  
5 CA\_C3695/CA\_C3694, CA\_P0040 and CA\_P0149 (Fig. 1A). Only one of these ORFs  
6 (CA\_C3693) was annotated in the ATCC 824 genome sequence. The eight aforementioned  
7 regulator genes were therefore designated quorum sensing regulators A to H (*qsrA* to *qsrH*),  
8 and their cognate quorum sensing peptide (Qsp)-encoding genes *qspA* to *qspH*, respectively.  
9 Together they were referred to as quorum sensing systems A to H (QssA to QssH).  
10 Comparison of the identified Qsp sequences revealed that they were of similar length but low  
11 overall sequence similarity (Fig. 1B). However, three amino acids at the C-terminal end were  
12 conserved in all Qsp proteins: a leucine, a proline and a tryptophan. The latter formed the C-  
13 terminal amino acid in all putative Qsp proteins, with the exception of QspB, which was  
14 extended by an additional seven amino acids.  
15 The deduced Qsr sequences were also of similar length and showed low overall similarity,  
16 apart from N-terminal region, which contained a Xre-type HTH motif. Using TPRpred (24),  
17 the remaining parts of the Qsr proteins were predicted to each possess 7 TPR domains, with  
18 the exception of QsrF, for which only six putative domains were detected. Comparison with  
19 other HTH-containing RNPP-type regulators revealed low identity and similarity values, with  
20 very few conserved amino acid positions, again mainly positioned in the predicted HTH-  
21 domains of the proteins (data not shown).  
22 Analysis of available genome sequences revealed the presence of similar systems in other  
23 members of the class *Clostridia*, notably the solventogenic *C. saccharoperbutylacetonicum*

1 strain N1-4 the genome of which was found to contain five putative RNPP-type gene clusters  
2 (see Fig. S1 in the supplemental material). However, no such systems (i.e. containing both  
3 regulator and peptide) could be identified in the closely related *C. beijerinckii*.

4

5 **Insertional inactivation of *qsr* genes using ClosTron technology.** Using ClosTron  
6 technology (25), all eight identified *qsr* genes were insertionally inactivated in the ATTC 824  
7 strain. Correct insertion of *ermB*-carrying introns into the target genes was confirmed by PCR  
8 screens, sequencing of PCR products, and Southern blotting as previously described (14; data  
9 not shown).

10 The chosen ClosTron insertion sites were located within the putative HTH-encoding region of  
11 the *qsr* genes (see Methods), thus ensuring that no active DNA-binding proteins could be  
12 formed. For each gene, at least three independently derived ClosTron clones were isolated  
13 and further characterised. This was done to avoid accidental isolation of mutant clones  
14 carrying undesired second site mutations: solventogenic *Clostridium* species including *C.*  
15 *acetobutylicum* are known to spontaneously ‘degenerate’, resulting in strains with a reduced or  
16 abolished capacity to form solvents and heat-resistant endospores (26, 27). A preliminary  
17 analysis revealed that one of the independently obtained *qsrC* mutant clones differed  
18 phenotypically from the other three and showed signs of degeneration (data not shown). This  
19 clone was therefore excluded from further, more detailed analyses.

20

21 **Phenotypic screening of *qsr* mutants.** The obtained *qsr* mutants were phenotypically  
22 characterised with respect to growth, colony morphology, starch degradation, granulose  
23 formation, sporulation, and solvent formation.

1 When cultured in CBM-S broth, several mutants showed minor differences in their growth  
2 kinetics when compared to the wild type (see Fig. S2 in supplemental material). Under the  
3 conditions employed, wild type cultures reached an OD<sub>600</sub> of 2.6 after 9 h, followed by a  
4 transient OD<sub>600</sub> decrease to 1.4 (24 h) before reaching the final maximum OD<sub>600</sub> of 3.1 (48 h).  
5 Concurrent with the transient decrease in OD<sub>600</sub>, the cultures began to appear more viscous.  
6 Similar profiles were observed for the mutants strains, although *qsrF* and *qsrG* mutants  
7 reached lower final ODs after 48 h (1.92 and 1.03, respectively), *qsrC* and *qsrD* mutants grew  
8 more slowly, and *qsrB* mutant cultures showed the transitory OD<sub>600</sub> decrease and viscosity  
9 increase already after 12 h. The low final OD<sub>600</sub> of the *qsrG* mutant presumably reflected the  
10 strain's tendency to form flock-like cell aggregates.

11 The ability to degrade starch was not affected in any of the mutants and granulose formation  
12 appeared similar to the wild type (data not shown). Interestingly, however, after 24 h of  
13 growth on CGM plates the *qsrB* mutants were observed as forming considerably larger  
14 colonies (2.0 mm) when compared to the wild type (1.3mm), a difference that was statistically  
15 significant ( $p < 0.00001$ ; Table 1).

16 Microscopic examination of CBM-S grown cultures revealed no noticeable changes in the  
17 number of endospores formed by *qsr* mutants when compared to the wild type. However, a  
18 significant 3-fold reduction ( $p = 0.036$ ) was observed for *qsrG* mutants when a more  
19 quantitative procedure was used, i.e. when the number of heat-resistant spores in a given  
20 culture volume was determined after 7 days of culture (Table S1 in supplemental material;  
21 more precisely, this procedure quantifies the number of heat-resistant colony forming units  
22 (cfu) as a measure for spores that can germinate and grow after heat treatment at 80 °C for 10  
23 min).

1 The ability of *qsr* mutants to form butanol, acetone, and ethanol was also assessed during early  
2 (24 h) and late (120 h) solventogenesis. According to their butanol production profiles (Fig.  
3 2), *qsr* mutants could be grouped into four categories: (i) early and late butanol titres similar to  
4 the wild type: *qsrC* and *qsrD* mutants; (ii) increased butanol titres during early  
5 solventogenesis: *qsrB* mutants; (iii) decreased butanol titres during early solventogenesis: *qsrA*  
6 and *qsrE* mutants; (iv) decreased butanol titres during late solventogenesis: *qsrF*, *qsrG*, *qsrH*.  
7 As a general rule, changes in butanol titers were mirrored by the corresponding acetone  
8 concentrations (Fig. 2). However, this was not always the case for ethanol. For instance, final  
9 (120 h) ethanol titres were significantly increased for the *qsrB* and *qsrE* mutants and early (24  
10 h) titres in *qsrA* and *qsrE* mutants were comparable to those of the wild type (Fig. 2).

11

12 **QsrB represses solvent formation.** Following the initial phenotypic screening, the *qsrB*  
13 mutants were selected for further, more detailed analyses as they exhibited a number of  
14 relevant phenotypic changes including growth profile, colony size/morphology, and solvent  
15 production. Particularly relevant from a biotechnological perspective was the increased  
16 production of butanol during early solventogenesis. More detailed fermentation profiles were  
17 therefore generated, with samples taken in regular intervals during a 120 h growth experiment.  
18 These profiles confirmed the increased production of solvents during early solventogenesis and  
19 also revealed that, after entry into stationary phase, *qsrB* cultures contained lower  
20 concentrations of butyric and acetic acid (see Fig. S3 in supplemental material). To obtain  
21 ultimate proof that *qsrB* inactivation was responsible for the observed phenotypes, the obtained  
22 *qsrB* mutants were genetically complemented. *qsrB* under control of its native promoter was  
23 cloned into the modular shuttle vector pMTL85141 (28) and the resulting pMTL85141-*qsrB*

1 vector was used to transform the *qsrB* mutant strains via electroporation. As a control,  
2 unmodified pMTL85141 was also introduced into both wild type and *qsrB* mutant strains.  
3 Indeed, complementation with plasmid-based *qsrB*, but not the empty shuttle vector, reversed  
4 the effects of *qsrB* inactivation, i.e. it reduced the production of all three solvents, increased the  
5 production of acetic and butyric acid, and reduced colony size (Fig. 3 and Table 1). However,  
6 while colony size was restored to approximately wild type levels, the metabolic changes  
7 resulting from the complementation were more drastic, i.e. solvent production by the  
8 complemented *qsrB* mutants was significantly lower, and acid production markedly higher than  
9 observed for the wild type. It was hypothesised that this was caused by the presence of multiple  
10 *qsrB* copies in the complemented mutants. Indeed, when these experiments were repeated using  
11 the shuttle vector pMTL85143, which carries a strong constitutive ferredoxin gene promoter to  
12 drive the expression of the inserted *qsrB* gene, very similar results were obtained (data not  
13 shown). Expression of *qsrB* in the wild type using the pMTL85141-*qsrB* and pMTL85143-*qsrB*  
14 plasmids yielded fermentation profiles similar to the ones observed for the complemented *qsrB*  
15 mutant, with increased production of acids and considerably reduced solvent formation (Table  
16 2).

17

18 **Overexpression of *qsrB* reduces spore formation.** Given the drastic effects that *qsrB* carrying  
19 plasmids had on acid and solvent formation, the number of heat-resistant endospores formed by  
20 the complemented *qsrB* mutants and *qsrB* overexpressing wild type were also assessed. These  
21 experiments revealed that in the presence of pMTL85141-*qsrB* both strains showed strongly  
22 reduced spore production (Fig. 4). Furthermore, while after 120 h and 168 h there was no  
23 statistically significant difference in spore counts between wild type and *qsrB* mutants which

1 both carried the empty pMTL85141 control plasmid, the latter reached final spore levels earlier  
2 than the wild type.

3

4 **Generation and characterisation of *qspB* mutants.** Based on the above results it appeared  
5 likely that *qsrB*-based quorum sensing contributes to the regulation of solvent formation and  
6 sporulation in *C. acetobutylicum*. To test this hypothesis, the role of the putative signalling  
7 peptide-encoding *qspB* gene, located downstream of *qsrB*, was investigated. Three independent  
8 *qspB* ClosTron mutants were generated and confirmed as described above for the *qsrB* mutants.  
9 While colony size, granulose formation, and final spore levels, were comparable to the wild  
10 type, *qspB* mutant cultures showed reduced levels of acetone and butanol during late stationary  
11 phase, i.e. after 72 h to 96 h. However, final (120 h) levels were comparable to the wild type  
12 (data not shown). Introduction of the aforementioned shuttle vectors (without insert) into *qspB*  
13 mutants and wild type abolished the observed differences and led to indistinguishable solvent  
14 profiles (Fig. 5). Thus, conclusive genetic complementation experiments could not be  
15 conducted. However, when the *qspB* overexpression plasmid pMTL85143-*qspB* was  
16 introduced into both wild type and *qspB*-deficient strains, solvent production increased  
17 significantly and butyrate concentrations during stationary phase were considerably lower than  
18 in the control strains carrying the empty pMTL85143 plasmid. Acetate production, however,  
19 remained largely unchanged (Fig 5B, 5C). Overexpression of *qspB* also increased colony size  
20 and lead to an earlier increase in heat-resistant colonies, although final spore levels appeared to  
21 be similar to wild type vector control (Fig. 6).

22

1 ***qspB*-encoded peptide fragments counteract QsrB-mediated repression of solventogenesis.**

2 The similar phenotypes observed for *qsrB*-knockout and *qspB*-overexpressing strains suggested  
3 that either QspB or a QspB-derived quorum sensing peptide may act to inhibit QsrB activity.  
4 To test the latter hypothesis, thirteen peptide variants were synthesised, varying in length  
5 between 6 and 20 amino acids and covering various parts of the C-terminal region of QspB.  
6 These were then tested for their ability to restore butanol production in the *qsrB* overexpressing  
7 strain *C. acetobutylicum* pMTL85141-*qsrB*. Cultures of this strain were supplemented with  
8 individual synthetic peptides at a final concentration of 10  $\mu$ M and assayed for butanol  
9 formation after 120 h. Several of the exogenously added peptides were capable of restoring  
10 high level butanol formation, whereas others had no discernible effect (Fig. S4 in the  
11 supplemental material). The latter group comprised all peptides terminating at amino acid 38 of  
12 the QspB sequence or starting at position 39, suggesting that the region conferring activity  
13 included amino acids upstream and downstream of these positions.

14 Based on these finding, additional peptide variants were designed, synthesised to a purity of  
15 >95% and similarly tested. Interestingly, exogenous addition of QspB7, a peptide comprising  
16 only seven amino acids (AEPTWGW) and matching positions 37-43 of the QspB precursor,  
17 was capable of fully restoring butanol production in the *qsrB* overexpressing *C. acetobutylicum*  
18 pMTL85143-*qsrB* strain (Fig. 7). The QspB7 sequence contained two of the three conserved  
19 amino acids present at the C-terminal end of all *C. acetobutylicum* Qsp proteins, i.e. proline and  
20 tryptophan (Fig. 1B). QspB-derived peptides capable of restoring high level butanol formation  
21 were also found to dramatically increase acetone and decrease acid production when added to  
22 the *qsrB* overexpressing strain (Fig. 7A, B). Furthermore, these peptides also restored high  
23 levels of sporulation (Fig. 7C)

1

## 2 **DISCUSSION**

3 For many years, the precise molecular signals and mechanisms that trigger solvent formation in  
4 Clostridia have remained elusive. Here we show for the first time that RNPP-type quorum  
5 sensing is one of the contributing factors in *C. acetobutylicum* and, potentially, other species.

6 RNPP-type quorum sensing systems consist of a TPR domain containing regulator proteins and  
7 small, linear signalling peptides which either activate or inhibit their corresponding regulators  
8 (21). Examples are the Rap-Phr systems in *B. subtilis*, which are involved in the regulation of  
9 competence and sporulation, and the PlcR-PapR systems of the *Bacillus cereus* group, which  
10 are known to regulate toxins and other genes important for environmental adaptation (19, 29).

11 The study presented here set out to examine the roles of putative RNPP-type quorum sensing  
12 systems in *C. acetobutylicum*, and in particular whether one or more of them played a role in  
13 the regulation of acid and solvent metabolism.

14 Bioinformatic analysis revealed the presence of at least eight such systems in each of the  
15 sequenced strains of this bacterium, including two that had previously been proposed (19). To  
16 investigate the regulatory role of these systems, we decided to inactivate the RNPP-type  
17 regulator genes, i.e. the different *qsr* genes, rather than the corresponding signalling peptide  
18 encoding genes. While inactivation of the latter would have provided the opportunity to  
19 complement any observed defects by adding back synthetic signalling peptides, it could not be  
20 ruled out that some or all Qsr proteins are responsive to more than one signal. Furthermore, the  
21 signalling peptide-encoding *qsp* genes are rather small and do therefore not represent ideal  
22 targets for ClosTron mutagenesis, whereas it was possible to inactivate all *qsr* genes by  
23 disrupting the postulated DNA-binding HTH motif encoded in the 5' region of these genes.



1 Like all mutagenesis procedures which involve frequent re-streaking of colonies, the ClosTron  
2 procedure carries an inherent risk of enriching for and isolating degenerate mutant strains (14).  
3 At least three independent mutant clones were therefore generated for each *qsr* gene and  
4 checked for phenotypic consistency, thus ensuring that observed phenotypic changes were  
5 caused by ClosTron insertion rather than second site mutations.

6 As a detailed analysis of all eight systems was beyond the scope of this study, a phenotypic  
7 screen was carried out to identify mutants of interest, i.e. those showing clear phenotypic  
8 differences in particular with relation to solvent metabolism. Intriguingly, inactivation of seven  
9 of these systems resulted in changed solvent profiles, although further studies will be necessary  
10 to establish whether these systems are directly involved the regulation of solvent genes, or  
11 indirectly through effects resulting from other changes in the cells' physiology and metabolism.

12 QssB was selected for or a more detailed analysis, as it was the only system whose inactivation  
13 increased solvent formation and also affected multiple other phenotypes.

14 Our mutational analyses suggest that QssB plays a regulatory role during early solvent  
15 formation, controlling its extent and, potentially, precise timing. The data are consistent with  
16 QsrB acting as a repressor that is inactivated upon binding to its cognate QspB-derived  
17 signalling peptide. Such a role is supported by (i) the finding that solvent formation was  
18 increased by *qsrB* inactivation and strongly decreased by *qsrB* overexpression; (ii) the  
19 observation that overexpression of *qsrB* and *qspB* had the opposite effects on solvent  
20 formation, sporulation and colony size; and (iii) the fact that suppression of solvent formation  
21 and sporulation in *qsrB* overexpressing cells could be overcome by adding synthetic, linear  
22 QspB-derived peptides to the culture medium.

1 How repression of solvent formation is mediated on the molecular level remains to be  
2 investigated. For instance, it is currently not clear whether QsrB directly represses solvent gene  
3 expression or whether it acts further up in the regulatory hierarchy, for example by affecting  
4 expression of *spo0A* or the genes required for its phosphorylation. However, given that in *C.*  
5 *acetobutylicum* Spo0A is a key factor in the regulation of both solvent formation and  
6 sporulation (7), the latter hypothesis would not explain why endospore formation remained  
7 largely unaffected following *qsrB* inactivation. For some aerobic, endospore-forming bacteria,  
8 a link between RNPP-type quorum sensing, sporulation and Spo0A activity is firmly  
9 established. In *B. subtilis*, for instance, several Rap-Phr systems are involved in controlling the  
10 degree of Spo0A phosphorylation. Following their uptake into the cell, the Phr peptides bind to  
11 and thereby inhibit their cognate Rap phosphatases, thus allowing Spo0F phosphorylation and  
12 transfer of the activating phosphate to Spo0A via Spo0B (19, 21). In *B. thuringiensis*, on the  
13 other hand, transcription of the PlcR regulator gene is activated by auto induction and repressed  
14 by Spo0A. Thus, in this organism, PlcR integrates information on state of growth (through  
15 Spo0A) and cell density (through its cognate signal peptide, PapR) (30, 31).

16 It is unclear why inactivation of the peptide encoding gene *qspB* had only limited effects during  
17 early solventogenesis, as the QsrB is expected to remain active and repress solvent formation in  
18 the absence of its cognate, inactivating signalling peptide. An intriguing possibility could be  
19 that QsrB responds to more than one signalling peptide, i.e. lack of QspB may be compensated  
20 for by signalling peptides produced by the other quorum sensing systems. This may also  
21 explain why the sporulation profile of the *qspB* mutant was so similar to that of the wild type.  
22 The fact that *qspB* overexpression resulted in a small increase in sporulation may indicate that,  
23 under the employed culture conditions, wild type signal molecule concentrations were not

1 sufficiently high to completely deactivate the QsrB repressor at the time when this process was  
2 induced, which would be in agreement with the slight increase in sporulation observed for the  
3 *qsrB* mutant.

4 An interesting question is why quorum sensing control of solvent formation has evolved in *C.*  
5 *acetobutylicum*. A possible explanation could be that coordinated, population-wide responses  
6 are required to efficiently control the rapid production of toxic acids and, perhaps, at a later  
7 stage, solvents. For an optimal response, individual cells within the population may need to  
8 sense the density of acid producing cells and this is achieved by the extracellular accumulation  
9 of peptide signals such as those derived from QspB. Thus, before critical concentrations are  
10 irreversibly reached that lead to a fatal ‘acid crash’ (32), a population-wide decision is made to  
11 stop production and trigger a metabolic shift resulting in acid re-uptake and solvent formation.  
12 Integrated with other relevant environmental information this may enable the organism to  
13 maximise the number of cells that can enter solventogenesis and thus, eventually, sporulation to  
14 secure long term survival. According to this view, uptake of acids and their conversion into  
15 solvents is a social, cooperative trait, which is co-ordinately induced through quorum sensing at  
16 the appropriate population density.

17 It is evident from the above that sensing their density may help populations to shift from acid to  
18 solvent metabolism at the optimal stage of growth. It is less clear, however, why the organism  
19 contains such a large number of putative signalling systems, totalling nine together with the  
20 previously described *agr* system (14). In many other bacteria, including pathogens, no more  
21 than one or two systems have been identified (although larger numbers have been described in  
22 some ubiquitous and metabolically versatile bacteria such as *Pseudomonas aeruginosa*) (33).

1 It is therefore intriguing to see that two other, physiologically very similar, solvent producing  
2 *Clostridium* species also contain a large number of putative signalling systems. Our analysis of  
3 the *C. saccharoperbutylacetonicum* genome revealed the presence of five complete RNPP-type  
4 systems (Fig. S1) in addition to four potential *agr* system (not shown). By contrast, our  
5 unpublished analysis of *C. beijernickii* NCIMB 8052 provided no evidence for complete (i.e.  
6 regulator plus peptide) RNPP-type systems, but identified six putative *agr* systems. Thus, while  
7 all three strains are members of the genus *Clostridium sensu stricto*, carry out ABE  
8 fermentations and, in the case of *C. beijernickii* and *C. saccharoperbutylacetonicum*, are very  
9 closely related, they have evolved very differently in terms of the cell-cell signalling systems  
10 they employ.

11 Most likely, the explanation for employing multiple signalling systems lies in the complex life  
12 cycles of these organisms which not only involve a shift in fermentation metabolism, but also  
13 sporulation and, under certain conditions, fruiting body formation (34). These are all  
14 phenotypes for which quorum sensing control has been demonstrated in other species.

15 Furthermore, use of multiple signals may permit ‘combinatorial communication’, enabling  
16 bacteria to adjust gene expression to both social and physicochemical properties of their  
17 environment, particularly when accumulation of the signal molecules differs due to their  
18 individual properties such as half-life, or because they possess different diffusion constants  
19 (35). Alternatively, different signals may enable cells to trigger responses at different density  
20 thresholds. To add to the complexity, the genomes of *C. acetobutylicum* and indeed all other  
21 members of the genus *Clostridium sensu stricto*, encode several orphan RNPP-type regulators  
22 which are not flanked by small, signalling peptide encoding genes. Whether genes of this type  
23 form part of a quorum sensing systems or act independently of signalling peptides remains to

1 be seen, but there is evidence to suggest that they, too, play major regulatory roles in their  
2 respective hosts. For instance, the CA\_C0957/CA\_C0958 regulators identified in this study  
3 were found to be essential for both solventogenesis and sporulation (Kotte and Winzer,  
4 unpublished data) and in *C. difficile*, another orphan RNPP-type regulator was very recently  
5 found to repress toxin production and motility, and upregulate sporulation (36).

6 The precise chemical nature of the Qsp-derived peptide signals produced by *C. acetobutylicum*  
7 remains to be established. In *B. subtilis*, some of the Phr peptides are derived from the C-  
8 termini of their respective precursor proteins whereas others stem from internal parts (19). A  
9 similar situation appears to be present in *C. acetobutylicum*. Our structure activity analysis of  
10 QspB derived peptide sequences clearly showed that biological activity is associated with a  
11 short internal sequence. However, for the other seven putative Qsp homologs, sequences  
12 corresponding to this region form the C-terminal end of the protein (Fig. 1).

13 Whereas the Phr signals produced by *B. subtilis* are pentapeptides, the *C. acetobutylicum* QspB  
14 peptide appears to be slightly larger given that a heptapeptide was the shortest sequence for  
15 which biological activity was observed (Fig. 7). This heptapeptide, AEPTWGW, contained two  
16 of the three conserved amino acids present in the C-terminal region of all Qsp proteins, i.e.  
17 proline and tryptophan, whereas a slightly larger nonamer, LGAEPTWGW, showed similar  
18 activity but also contained the third conserved amino acid, leucine. The situation might  
19 resemble that of PlcR and its cognate heptapeptide signal, PapR, in the *B. cereus* group.  
20 Originally believed to be a pentapeptide due to its biological activity, the native PapR signal  
21 was later found to be a heptamer (37). PapR peptides from different strains of this group show  
22 some variation in the first three N-terminal residues, whereas the C-terminal parts are relatively  
23 conserved (38). Although the predicted *C. acetobutylicum* Qsp peptides show a larger degree of

1 variation, the aforementioned proline (position -5) and tryptophan (position -1) are always  
2 present. Interestingly, the peptides produced by *B. subtilis* and the *B. cereus* group all contain  
3 charged amino acids (19, 38), whereas this is not the case for the majority of Qsp peptides.  
4 Only QspB, QspD and QspE are predicted to carry a negative charge, whereas all other Qsp  
5 peptides are highly hydrophobic. Whether and how this relates to their biological roles remains  
6 to be investigated.

7 In summary, we have shown that multiple signalling systems exist in *C. acetobutylicum* and  
8 related organisms, at least one of which plays a role in the regulation of solvent formation and  
9 sporulation. Population density appears to be an important parameter that, together with other  
10 environmental and internal stimuli, is sensed and integrated by a complex regulatory network  
11 that governs fermentation metabolism, sporulation and other important aspects in the life cycle  
12 of these organisms.

13

## 14 **MATERIALS AND METHODS**

15

16 **Bacterial strains and media.** Bacterial strains utilised in this study are listed in Table S2. *C.*  
17 *acetobutylicum* ATTC 824 and its mutant derivatives were grown at 37°C in an anaerobic  
18 cabinet (MG1000 Anaerobic Work Station, Don Whitley Scientific) containing an atmosphere  
19 of 80% nitrogen, 10% hydrogen and 10% carbon dioxide. The organism was routinely  
20 cultured in supplemented clostridial basal medium (CBMS) (39), unless stated otherwise.  
21 CBMS was based on CBM as previously described (40) but contained glucose (50 g/l) and  
22 calcium carbonate (5 g/l) as a buffering agent. For agar plates, 10 g/l agar was added and  
23 calcium carbonate was omitted. *Escherichia coli* TOP10 was grown in Lysogeny broth at  
24 37°C. Antibiotics were used at the following concentrations: chloramphenicol, 25 µg/ml;

1 erythromycin, 40 µg/ml; tetracycline, 10 µg/ml; thiamphenicol, 15 µg/ml. *C. acetobutylicum*  
2 wild type and all mutants generated in this study were stored as spore stocks.

3

4 **Plasmids, oligonucleotides, DNA techniques.** Plasmids and oligonucleotides used in this  
5 study are listed in Tables S3 and S4 (supplemental material) and were synthesised by Eurofins  
6 MWG Operon, Germany. PCR amplifications were carried out using high fidelity Phusion  
7 polymerase or *Taq* DNA polymerase (both from New England Biolabs). Electroporation of *C.*  
8 *acetobutylicum* was performed as described previously (12). Plasmid isolation and genomic  
9 DNA preparations were carried out using the QIAprep Miniprep kit (Qiagen, UK) and DNeasy  
10 Blood & Tissue kit (Qiagen), respectively. Restriction enzymes were supplied by New  
11 England Biolabs and Promega and were used according to the manufacturers' instructions.  
12 Southern blotting and hybridisation was carried out as previously described (39).

13

14 **Construction of mutants using ClosTron technology.** Mutants were constructed in *C.*  
15 *acetobutylicum* ATTC 824 using retargeted ClosTron plasmids according to Heap *et al.* (25).  
16 The plasmids were designed using the 'intron targeting and design tool' available on  
17 <http://www.ClosTron.com/ClosTron2.php> and purchased from DNA2.0. Numbers in the  
18 plasmid names (Table S3) indicate the retargeting site used which, in the case of RNPP-type  
19 genes, was located within the HTH-encoding region. Genomic DNA from putative mutants  
20 was subjected to several PCR screens to establish whether the ClosTron-derived group II  
21 intron had inserted into the desired gene target. These included (i) primer pairs that annealed  
22 on either side of the target site and (ii) individual flanking primers together with a group II  
23 intron specific primer (the latter amplifying the intron–exon junctions). The generated PCR

1 fragments were sequenced to obtain definite proof that insertion had occurred at the desired  
2 position. Finally, using chromosomal DNA of all mutant, Southern blot analysis was  
3 performed to confirm that only single ClosTron insertions had occurred. At least three  
4 independent mutants were generated for each gene.

5  
6 **Generation of complementation and overexpression vectors.** To construct the *qsrB*  
7 complementation vector pMTL85141-*qsrB*, a 1659 bp fragment containing the *qsrB* gene and  
8 a 351 bp 5' non-coding region expected to contain the gene's native promoter were PCR  
9 amplified from genomic *C. acetobutylicum* ATCC 824 DNA using the primer pair  
10 QsrB\_C\_F1/QsrB\_C\_R1 (Table S4). These contained SbfI and NotI restriction sites,  
11 respectively, so that the resulting fragment could be cloned into the equally digested clostridial  
12 shuttle vector pMTL85141 (29). The resulting vector pMTL85141-*qsrB* was confirmed by  
13 restriction analysis and sequencing.

14 To obtain an overexpression vector in which *qsrB* expression was driven by the strong *C.*  
15 *sporogenes* *fdx*-promoter the 1336 bp *qsrB* gene was PCR amplified from genomic DNA with  
16 the primer pair QsrB\_C\_F2/QrB\_C\_R2 (Table S4). These primers contained NdeI and BamHI  
17 restriction sites, respectively, which were used to clone the obtained DNA fragment into the  
18 clostridial shuttle vector pMTL85143 downstream of the *fdx*-promoter (Dr. Ying Zhang,  
19 University of Nottingham, unpublished). The resulting vector pMTL85143-*qsrB* was  
20 confirmed by restriction analysis and sequencing.

21 To obtain the *qspB* expression vector pMTL85143-*qspB*, the 178 bp *qspB* gene was PCR  
22 amplified from genomic DNA of *C. acetobutylicum* ATCC 824 using the primer pair  
23 QspB\_C\_F1/QspB\_C\_R1. These primers contained NdeI and EcoRI restriction sites,



1 respectively, which were used to clone the obtained DNA fragment into the clostridial shuttle  
2 vector pMTL85143 downstream of the *fdx*-promoter. The resulting vector pMTL85143-*qspB*  
3 was confirmed by restriction analysis and sequencing.

4  
5 **Spore assays and detection of granulose.** *C. acetobutylicum* strains were grown in 5 ml  
6 CBMS to enable sporulation. After 7 days, a 200 µl sample of culture was heated to 80°C for  
7 10 min. Serial dilutions were carried out and 20 µl aliquots of the heat-treated cell suspension  
8 plated onto CBM agar. Agar plates were incubated for 48 h before CFUs were enumerated.  
9 For each assay, a *spo0A* mutant (25) and the wild type were included as negative and positive  
10 controls, respectively.

11 To assess the accumulation of granulose, *C. acetobutylicum* strains were grown on CBM agar  
12 containing 5% glucose. Colonies were stained with iodine as previously described (14).

13

14 **Determination of colony size.** Overnight cultures were serial diluted before plating onto  
15 CGM plates (clostridial growth medium containing 1.5% agar; 41) and further incubation for  
16 24 h. To avoid negative impacts on growth, the CGM plates did not contain antibiotics.  
17 Measurements were taken from enlarged plate images alongside a scale. For each colony three  
18 independent diameter readings were taken and averaged to account for the fact that some  
19 colonies were noncircular. A total of twenty colonies per strain were analysed.

20

21 **Addition of synthetic QspB fragments to *qsrB* overexpressing strains.** Synthetic linear  
22 peptides representing C-terminal fragments of the QspB sequence were synthesised and  
23 purified by Peptide Protein Research Ltd (Fareham, UK). Thirteen variants were initially

1 obtained (Fig. S4 in supplementary materials) the purity of which was estimated to range from  
2 89-99%, apart from peptides TRSLLGAE, LGAEPTWGWNISKLLF, and TRSLLGAEPT-  
3 WGWNISKLLF (72%, 79% and 83%, respectively). A selection of peptides showing the  
4 highest activities in an initial screen as well as several additional variants (as listed in Fig. 7)  
5 were then re-synthesised to >95% purity. Lyophilised peptides were dissolved in DMSO to  
6 obtain 20 mM stock solutions. 200 ml of CBMS was inoculated to OD 0.05 with a *C.*  
7 *acetobutylicum* pMTL85143-*qsrB* pre-culture and grown for 4 h. At this point, 10-ml aliquots  
8 of the culture were distributed into individual 15-ml Falcon tubes, each containing 5 µl of a  
9 particular 20 mM peptide stock solution. Controls only contained 5 µl DMSO. Each peptide or  
10 control culture was set up in triplicate.

11

12 **Analysis of fermentation products.** *C. acetobutylicum* ATCC 824 wild type and mutants  
13 were grown in 50-ml-Falcon tubes containing 30 ml of CBMS. At relevant time points, 1 ml  
14 samples were removed, placed on ice and centrifuged at 16,000 x g for 5 min to obtain cells-  
15 free culture supernatant. Extraction of fermentation products and their gas chromatographic  
16 analysis was carried out as described previously (39).

17

18 **Statistical analysis.** All numerical data were stored and analysed in IBM SPSS Statistics 19  
19 and 20 (IBM Corporation, Armonk, US) and Microsoft Excel 2007 and 2010. Significance  
20 levels were determined with an independent sample two way t-test in IBM SPSS Statistics  
21 (IBM). Data were graphically visualised in GraphPad Prism5 (GraphPad Software, La Jolla,  
22 USA) and Excel. Errors bars provided indicate standard deviation.

23

1

## 2 **ACKNOWLEDGEMENTS**

3 This work was supported by the European Union Marie Curie Initial Training Network  
4 ‘CLOSNET’ (contract number 237942) and the Biotechnology and Biological Sciences  
5 Research Council UK through BBSRC Sustainable Bioenergy Centre project grant  
6 BB/G016224/1 and Doctoral Training Partnership BB/J014508/1.

7

## 8 **REFERENCES**

- 9 1. **Dürre P. 2005.** Formation of solvents in clostridia, p671-693. 2005. *In* P. Dürre (ed.),  
10 Handbook on clostridia. CRC Press, Boca Raton, Fla.
- 11 2. **Jones DT, Woods DR.** 1986. Acetone-butanol fermentation revisited. *Microbiol. Rev.*  
12 **50**:484-524.
- 13 3. **Jones DT.** 2001. Applied acetone-butanol fermentation, p. 125–168. *In* H. Bahl and P.  
14 Dürre (ed.), *Clostridia. Biotechnology and medical applications.* Wiley-VCH Verlag  
15 GmbH, Weinheim, Germany.
- 16 4. **Lütke-Eversloh T, Bahl H.** 2011. Metabolic engineering of *Clostridium acetobutylicum*:  
17 Recent advances to improve butanol production. *Curr. Opin. Biotech.* **22**:1-14.
- 18 5. **Tracy BP, Gaida SM, Papoutsakis ET.** 2008. Development and application of flow-  
19 cytometric techniques for analyzing and sorting endospore-forming clostridia. *Appl.*  
20 *Environ. Microbiol.* **74**:7497–7506.
- 21 6. **Ravagnani, A, Jennert KC, Steiner, Grünberg ER, Jefferies JR, Wilkinson SR,**  
22 **Young DI, Tidswell EC, Brown DP, Youngman P, Morris JG, and Young M.** 2000.

- 1 Spo0A directly controls the switch from acid to solvent production in solvent-forming  
2 clostridia. *Mol. Microbiol.* **37**:1172-1185.
- 3 7. **Harris LM, Welker NE, Papoutsakis ET.** 2002. Northern, morphological, and  
4 fermentation analysis of *spo0A* inactivation and overexpression in *Clostridium*  
5 *acetobutylicum* ATCC 824. *J. Bacteriol.* **184**:3586-3597.
- 6 8. **Thormann K, Feustel L, Lorenz K, Nakotte S, Durre P.** 2002. Control of butanol  
7 formation in *Clostridium acetobutylicum* by transcriptional activation. *J Bacteriol*  
8 **184**:1966–1973.
- 9 9. **Nold, N.** 2008. Untersuchungen zur Regulation des sol-Operons in *Clostridium*  
10 *acetobutylicum*. PhD thesis, University of Ulm.
- 11 10. Zimmermann, T. 2013. Untersuchungen zur Butanolbildung von *Hyperthermus butylicus*  
12 und *Clostridium acetobutylicum*. PhD thesis, University of Ulm.
- 13 11. **Ren C, Gu Y, Wu Y, Zhang W, Yang C, Yang S, Jiang W.** 2012. Pleiotropic functions  
14 of catabolite control protein CcpA in butanol-producing *Clostridium acetobutylicum*.  
15 *BMC Genomics* **13**:349.
- 16 12. **Steiner E, Dago AE, Young DI, Heap JT, Minton NP, Hoch JA, Young M.** 2011.  
17 Multiple orphan histidine kinases interact directly with Spo0A to control the initiation of  
18 endospore formation in *Clostridium acetobutylicum*. *Mol. Microbiol.* **80**:641-654.
- 19 13. **Zhao Y, Tomas CA, Rudolph FB, Papoutsakis ET, Bennett GN.** 2005. Intracellular  
20 butyryl phosphate and acetyl phosphate concentrations in *Clostridium acetobutylicum* and  
21 their implications for solvent formation. *Appl. Environ. Microbiol.* **71**:530–537.

- 1 14. **Steiner E, Scott J, Minton NP, Winzer K. 2012.** An agr quorum sensing system that  
2 regulates granulose formation and sporulation in *Clostridium acetobutylicum*. Appl.  
3 Environ. Microbiol. **78**:1113–1122.
- 4 15. **Sturme MHJ, Kleerebezem M, Nakayama J, Akkermans ADL, Vaughan EE, de Vos**  
5 **WM. 2002.** Cell to cell communication by autoinducing peptides in Gram-positive  
6 bacteria. Antonie Van Leeuwenhoek **81**:233-243.
- 7 16. **Lyon GJ, Novick RP. 2004.** Peptide signaling in *Staphylococcus aureus* and other Gram-  
8 positive bacteria. Peptides **25**:1389-1403.
- 9 17. **Kosaka T, Nakayama S, Nakaya K, Yoshino S, Furukawa K. 2007.** Characterization  
10 of the sol operon in butanol-hyperproducing *Clostridium saccharoperbutylacetonicum*  
11 strain N1-4 and its degeneration mechanism. Biosci. Biotechnol. Biochem. **71**:58–68.
- 12 18. **Wuster A, Babu MM. 2008.** Conservation and evolutionary dynamics of the agr cell-to-  
13 cell communication system across firmicutes. J. Bacteriol. **190**:743-746.
- 14 19. **Pottathil M, Lazazzera BA. 2003.** The extracellular Phr peptide-Rap phosphatase  
15 signaling circuit of *Bacillus subtilis*. Front. Biosci. **8**:32-45.
- 16 20. **Declerck N, Bouillaut L, Chaix D, Rugani N, Slamti L, Hoh F, Lereclus D, Arold ST.**  
17 **2007.** Structure of PlcR: Insights into virulence regulation and evolution of quorum  
18 sensing in Gram-positive bacteria. Proc. Natl. Acad. Sci. USA. **104**:18490-18495.
- 19 21. **Rocha-Estrada J, Aceves-Diez A, Guarneros G, De La Torre M. 2010.** The RNPP  
20 family of quorum-sensing proteins in Gram-positive bacteria. Appl. Microbiol.  
21 Biotechnol. **87**:913-923.
- 22 22. **Hu S, Zheng H, Gu Y, Zhao J, Zhang W, Yang Y, Wang S, Zhao G, Yang S, Jiang**  
23 **W. 2011.** Comparative genomic and transcriptomic analysis revealed genetic

- 1 characteristics related to solvent formation and xylose utilization in *Clostridium*  
2 *acetobutylicum* EA 2018. BMC Genomics **12**:93
- 3 23. **Bao G, Wang R, Zhu Y, Dong H, Mao S, Zhang Y, Chen Z, Li Y, Ma Y.** 2011.  
4 Complete genome sequence of *Clostridium acetobutylicum* DSM 1731, a solvent-  
5 producing strain with multireplicon genome architecture. J. Bacteriol. **193**:5007–5008.
- 6 24. **Karpenahalli M, Lupas A, Soding, J.** 2007. TPRpred: a tool for prediction of TPR-,  
7 PPR- and SEL1-like repeats from protein sequences. BMC Bioinformatics **8**:2.
- 8 25. **Heap JT, Kuehne SA, Ehsaan M, Cartman ST, Cooksley CM, Scott JC, Minton NP.**  
9 2010. The ClosTron: mutagenesis in *Clostridium* refined and streamlined. J. Microbiol.  
10 Methods **80**:49-55.
- 11 26. **Hartmanis MGN, Ahlman H, Gatenbeck S.** 1986. Stability of solvent formation in  
12 *Clostridium acetobutylicum* during repeated subculturing. Appl. Microbiol. Biotechnol.  
13 **23**:369-371.
- 14 27. **Kashket ER, Cao Z-Y.** 1995. Clostridial strain degeneration. FEMS Microbiol Rev.  
15 **17**:307-316.
- 16 28. **Heap JT, Pennington OJ, Cartman ST, Minton NP.** 2009. A modular system for  
17 *Clostridium* shuttle plasmids. J. Microbiol. Methods **78**:79-85.
- 18 29. **Gohar M, Faegri K, Perchat S, Ravnum S, Okstad OA, Gominet M, Kolsto AB,**  
19 **Lereclus D.** 2008. The PlcR virulence regulon of *Bacillus cereus*. PLoS ONE **3**:e2793.
- 20 30. **Lereclus D, Agaisse H, Grandvalet C, Salamiou S, Gominet M.** 2000. Regulation of  
21 toxin and virulence gene transcription in *Bacillus thuringiensis*. Int. J. Med. Microbiol.  
22 **290**:295-299.

- 1 31. **Gominet M, Slamti L, Gilois N, Rose M, Lereclus D.** 2001. Oligopeptide permease is  
2 required for expression of the *Bacillus thuringiensis plcR* regulon and for virulence. *Mol*  
3 *Microbiol* **40**:963–975.
- 4 32. **Maddox IS, Steiner E, Hirsch S, Wessner S, Gutierrez NA, Gapes JR, Schuster KC.**  
5 2000. The cause of “acid-crash” and “acidogenic fermentations” during the batch acetone-  
6 butanol-ethanol (ABE-) fermentation process. *J. Mol. Microbiol. Biotechnol.* **2**:95–100.
- 7 33. **Diggle SP, West SA, Gardner A, Griffin AS.** 2008. Communication in bacteria. In  
8 *Sociobiology of communication: An interdisciplinary perspective* (ed. David Hughes &  
9 Patrizia D'Ettorre): pp. 11-31. Oxford University Press.
- 10 34. **Jones DT, Webster JR, Woods DR.** 1980. The formation of simple fruiting body like  
11 structures associated with sporulation under aerobic conditions. *J. Gen. Microbiol.*  
12 **116**:195-200.
- 13 35. **Cornforth DM, Popat R, McNally L, Gurney J, Scott-Phillips TC, Ivens A, Diggle**  
14 **SP, Brown SP.** 2014 Combinatorial quorum sensing allows bacteria to resolve their social  
15 and physical environment. *Proc. Natl Acad. Sci. USA* **111**:4280-4284.
- 16 36. **Edwards AN, Tamayo R, McBride SMA.** 2016. Novel regulator controls *Clostridium*  
17 *difficile* sporulation, motility and toxin production. *Mol. Microbiol.* **100**:954-971.
- 18 37. **Bouillaut L, Perchat S, Arold S, Zorrilla S, Slamti L, Henry C, Gohar M, Declerck**  
19 **N, Lereclus D.** 2008. Molecular basis for group-specific activation of the virulence  
20 regulator PlcR by PapR heptapeptides. *Nucleic Acids Res.* **36**:3791-3801.
- 21 38. **Slamti L, Lereclus D.** 2005. Specificity and polymorphism of the PlcR-PapR quorum-  
22 sensing system in the *Bacillus cereus* group. *J. Bacteriol.* **187**:1182-1187.

- 1 39. **Cooksley CM, Zhang Y, Wang H, Redl S, Winzer K, Minton NP.** 2012. Targeted  
2 mutagenesis of the *Clostridium acetobutylicum* acetone–butanol–ethanol fermentation  
3 pathway. *Metab. Eng.* **14**:630–641.
- 4 40. **O'Brien RW, Morris JG.** 1971. Oxygen and the growth and metabolism of *Clostridium*  
5 *acetobutylicum*. *J. Gen. Microbiol.* **68**:307-318.
- 6 41. **Hartmanis MGN, Gatenbeck S.** 1984. Intermediary metabolism in *Clostridium*  
7 *acetobutylicum*: levels of enzymes involved in the formation of acetate and butyrate.  
8 *Appl. Environ. Microbiol.* **47**:1277-1283.

9  
10

## 11 **FIGURE LEGENDS**

12 Figure 1. Schematic representation of *C. acetobutylicum* RNPP quorum sensing gene clusters  
13 (A) and alignment of putative signalling peptide precursor sequences (B).

14 (A) Eight RNPP quorum sensing gene clusters have been identified (QssA to QssH), each  
15 encoding an RNPP-type regulator (QsrA to QspH, large arrows) and a signalling peptide  
16 precursor (QspA to QspH, short yellow arrows). The locus tags for each system are provided,  
17 where available. Regions encoding a helix-turn-helix motif (HTH, green) and tetratricopeptide  
18 repeat domains (red) are indicated. (B) The Clustal Omega amino acid sequence alignment  
19 shows the eight predicted Qsp proteins. Red font indicates amino acids that are 100%  
20 conserved; blue and green fonts indicate positively (K, R) and negatively charged (D, E) amino  
21 acids, respectively. Identical (\*), conserved (:), and semi-conserved substitutions (.) are shown.  
22 Numbers indicate the length of the different precursor proteins. Positively charged,



1 hydrophobic, and predicted signalling peptide-encoding regions are indicated with blue, grey,  
2 and red lines, respectively.

3

4 Figure 2. Solvent formation by *C. acetobutylicum* *qsr* mutants.

5 Formation of butanol (A), acetone (B) and ethanol (C) was monitored in CBM-S broth after 24  
6 h (left hand panels) and 124 h (right hand panels) for all eight *qsr* mutants and compared to the  
7 ATTC 824 parent strain. (B) After 72 h, culture supernatant samples were taken and analysed  
8 for the produced acids (acetate, checks; butyrate, lines) and solvents (butanol, white; acetone,  
9 grey; ethanol, black). The data represent the mean of three independent cultures with error bars  
10 indicating the standard deviation. Significant differences ( $p \leq 0.05$ ) compared to the wildtype are  
11 indicated by an asterisk.

12

13 Figure 3. Fermentation profile of *C. acetobutylicum* wild type, *qsrB* mutants and genetically  
14 complemented *qsrB* mutants

15 Growth (A) and production of acids (B) and solvents (C) were compared for the ATTC 824  
16 parent strain containing the empty pMTL85141 vector (closed circles), the *qsrB* mutants  
17 containing the empty pMTL85141 vector (open circles), and the *qsrB* mutants containing the  
18 complementation plasmid pMTL85141-*qsrB* (open triangles). Data represent the mean of four  
19 independent cultures with error bars indicating the standard deviation. Significant differences  
20 ( $p \leq 0.05$ ) compared to the wildtype are indicated by an asterisk next to the relevant data point.

21

22

1 Figure 4. Effect of *qsrB* deletion and overexpression on sporulation.

2 The ability to sporulate was assessed for the ATTC 824 parent strain containing the empty  
3 pMTL85141 vector (closed circles), the *qsrB* mutants containing the empty pMTL85141 vector  
4 (open circles), the *qsrB* mutants containing the pMTL85141-*qsrB* complementation plasmid  
5 (open triangles), and the ATTC 824 parent strain containing the pMTL85141-*qsrB*  
6 complementation plasmid (closed triangles). Sporulation efficiencies were assessed by  
7 determining the number of heat-resistant endospores produced at the indicated time points.  
8 Data represent the mean of four independent cultures with error bars indicating the standard  
9 deviation. Only the upper half of the error bar is shown in cases where the lower half extends  
10 beyond the x axis. Significant differences ( $p \leq 0.05$ ) compared to the vector-carrying wild type  
11 and vector-carrying *qsrB* mutant are indicated by an asterisk next to the relevant data point.

12

13 Figure 5. Fermentation profiles of *qspB*-overexpressing *C. acetobutylicum* wild  
14 type and *qspB* mutants.

15 Growth (A) and production of acids (B) and solvents (C) were compared for the  
16 ATTC 824 parent strain (closed symbols) and *qspB* mutant (open symbols)  
17 containing either the empty pMTL85143 vector (circles) or the overexpression  
18 plasmid pMTL85143-*qspB* (triangles). Data represent the mean of four independent  
19 cultures with error bars indicating the standard deviation. Significant differences  
20 ( $p \leq 0.05$ ) compared to the vector controls are indicated by an asterisk next to the  
21 relevant data point.

22

23

1 Figure 6. Effect of *qsrB* overexpression on sporulation and colony size.

2 (A) The ability to sporulate was assessed for the *C. acetobutylicum* ATCC 824  
3 parent strain containing the empty pMTL85143 vector (black bars) and the  
4 overexpression plasmid pMTL85143-*qspB* (white bars). Data represent the mean of  
5 four independent cultures with error bars indicating the standard deviation.  
6 Significant differences ( $p \leq 0.05$ ) compared to the vector controls are indicated by  
7 an asterisk next to the relevant measurement. (B) 5-day old colonies of *C.*  
8 *acetobutylicum* carrying the empty pMTL85143 vector (left) and overexpression  
9 plasmid pMTL85143-*qspB*, respectively.

10

11 Figure 7. Synthetic peptides alleviate *qsrB*-mediated repression of solvent formation and  
12 sporulation.

13 (A) Solvent titres: butanol (light grey), acetone (dark grey), ethanol (black). (B) Acid titres:  
14 butyrate (dark grey), acetate (light grey). (C) Spore titres (heat-resistant CFU). Synthetic  
15 peptides (D) were dissolved in DMSO and individually added to cultures of *C. acetobutylicum*  
16 pMTL85143-*qsrB* after 4 h of growth to a final concentration of 10  $\mu$ M. DMSO-only controls  
17 were performed for *C. acetobutylicum* pMTL85143 and *C. acetobutylicum* pMTL85143-*qsrB*,  
18 respectively. Cultures were grown for 5 days prior to analysis. *C. acetobutylicum* pMTL85143  
19 vector control (Vector); *C. acetobutylicum* pMTL85143-*qsrB* cultures (QsrB). Presence of  
20 specific synthetic peptides as shown in (D) is indicated (+ QspB). The complete QspB  
21 sequence is given at the bottom with the three conserved amino acid positions in the C-  
22 terminal region (leucine, proline, tryptophan) indicated by bold red lettering. Data represent  
23 the mean of three independent cultures with error bars indicating the standard deviation.

24

1 **TABLE 1** Colony size of *Clostridium acetobutylicum* parents strain and *qsrB* mutants on  
2 CGM medium after 24 h

| Strain                                                       | Mean colony size<br>in mm $\pm$ SD (n=20) |
|--------------------------------------------------------------|-------------------------------------------|
| <i>C. acetobutylicum</i> ATCC 824                            | 1.3 $\pm$ 0.49                            |
| <i>C. acetobutylicum qsrB::CTermB</i>                        | 2.0 $\pm$ 0.24*****                       |
| <i>C. acetobutylicum</i> ATCC 824 pMTL 85141                 | 1.2 $\pm$ 0.32                            |
| <i>C. acetobutylicum qsrB::CTermB</i> pMTL85141              | 1.5 $\pm$ 0.35**                          |
| <i>C. acetobutylicum qsrB::CTermB</i> pMTL85141- <i>qsrB</i> | 1.0 $\pm$ 0.28 <sup>NS</sup>              |

3 <sup>NS</sup> not significantly different to the vector carrying wildtype; \*\*significantly different to the  
4 vector carrying wildtype at p<0.01; \*\*\*\*\*significantly different to the vector-free wildtype  
5 control at p<0.00001.  
6

7

8

9

10

11 **TABLE 2** Effect of *qsrB* overexpression on the fermentation product profile of wild type *C.*  
12 *acetobutylicum* ATCC 824 after 120 h.

| Product<br>[mM] | <i>C. acetobutylicum</i> |                        |             |                        |
|-----------------|--------------------------|------------------------|-------------|------------------------|
|                 | pMTL85141                | pMTL85141- <i>qsrB</i> | pMTL85143   | pMTL85143- <i>qsrB</i> |
| Butyrate        | 7 $\pm$ 1                | 36 $\pm$ 3*****        | 13 $\pm$ 13 | 48 $\pm$ 15*****       |
| Acetate         | 6 $\pm$ 3                | 14 $\pm$ 1**           | 25 $\pm$ 18 | 35 $\pm$ 16*           |
| Butanol         | 103 $\pm$ 15             | 15 $\pm$ 3*****        | 86 $\pm$ 23 | 9 $\pm$ 4***           |
| Acetone         | 54 $\pm$ 4               | 4 $\pm$ 1*****         | 38 $\pm$ 18 | 1 $\pm$ 1**            |
| Ethanol         | 18 $\pm$ 4               | 4 $\pm$ 3**            | 15 $\pm$ 9  | 1 $\pm$ 1*             |

13 \*, \*\*, \*\*\* and \*\*\*\*\* indicate significant differences to the vector carrying wild type at p<0.05,  
14 p<0.01, p<0.001, and p<0.0001, respectively.  
15

## Figure 1

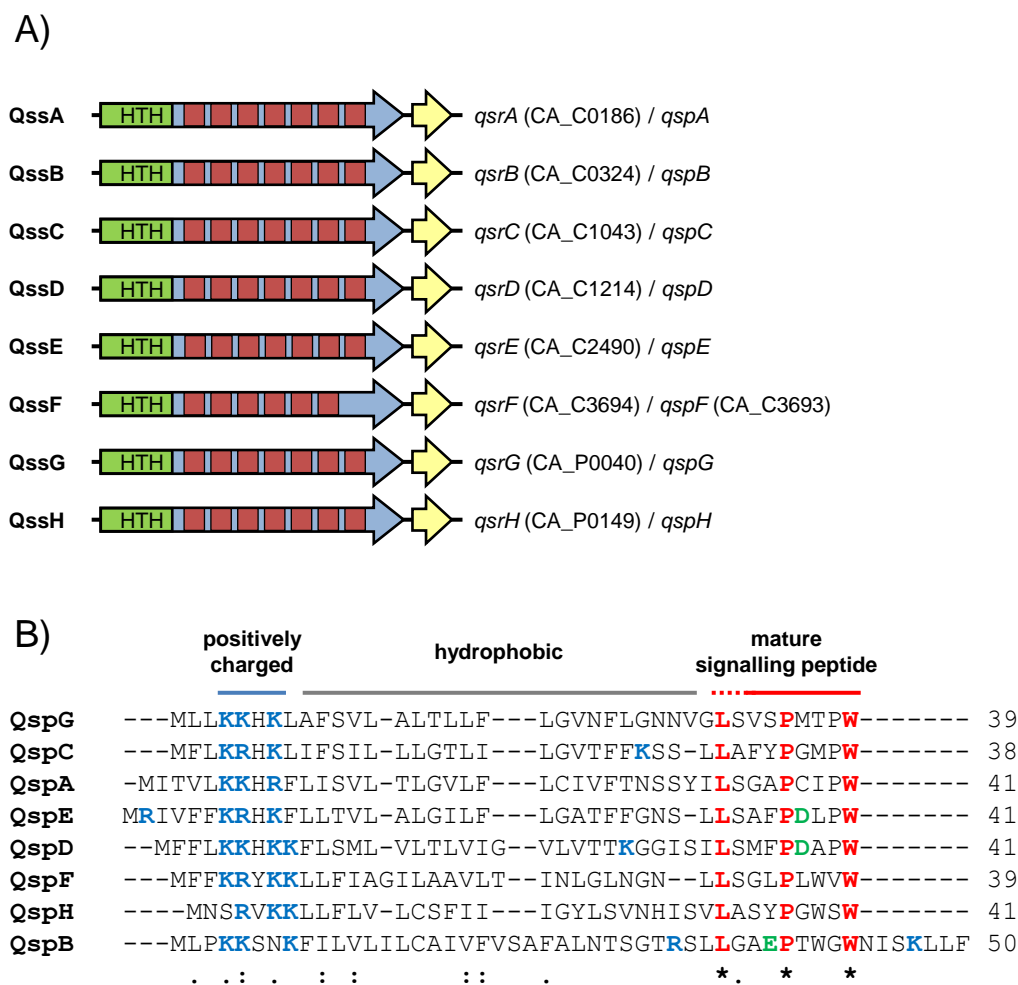

Figure 1. Schematic representation of *C. acetobutylicum* RNPP quorum sensing gene clusters (A) and alignment of putative signalling peptide precursor sequences (B).

(A) Eight RNPP quorum sensing gene clusters have been identified (QssA to QssH), each encoding an RNPP-type regulator (QsrA to QspH, large arrows) and a signalling peptide precursor (QspA to QspH, short yellow arrows). The locus tags for each system are provided, where available. Regions encoding a helix-turn-helix motif (HTH, green) and tetratricopeptide repeat domains (red) are indicated. (B) The Clustal Omega amino acid sequence alignment shows the eight predicted Qsp proteins. Red font indicates amino acids that are 100% conserved; blue and green fonts indicate positively (K, R) and negatively charged (D, E) amino acids, respectively. Identical (\*), conserved (:), and semi-conserved substitutions (.) are shown. Numbers indicate the length of the different precursor proteins. Positively charged, hydrophobic, and predicted signalling peptide-encoding regions are indicated with blue, grey, and red lines, respectively.

Figure 2

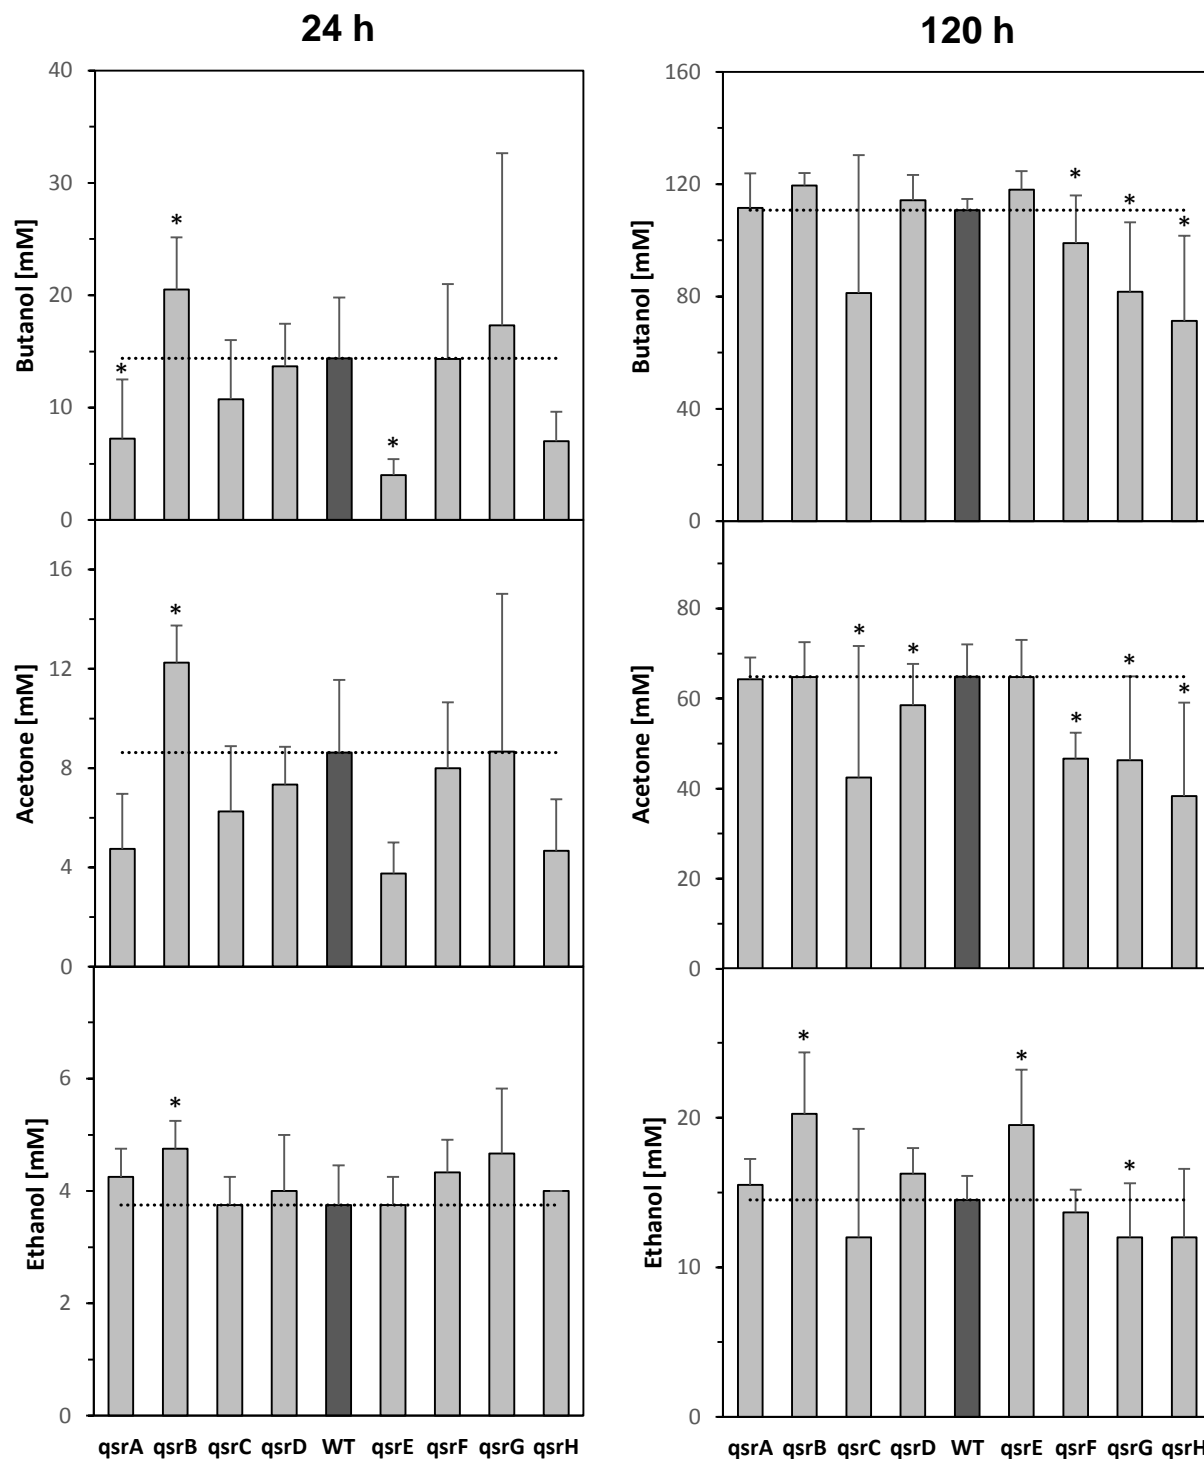

Figure 2. Solvent formation by *C. acetobutylicum* *qsr* mutants.

Formation of butanol (top), acetone (middle) and ethanol (bottom) was monitored in CBM-S broth after 24 h (left hand panels) and 120 h (right hand panels) for all eight *qsr* mutants (light grey) and compared to the ATTC 824 parent strain (dark grey). The data represent the mean of three independent cultures with error bars indicating the standard deviation. Significant differences ( $p \leq 0.05$ ) compared to the wildtype are indicated by an asterisk.

Figure 3

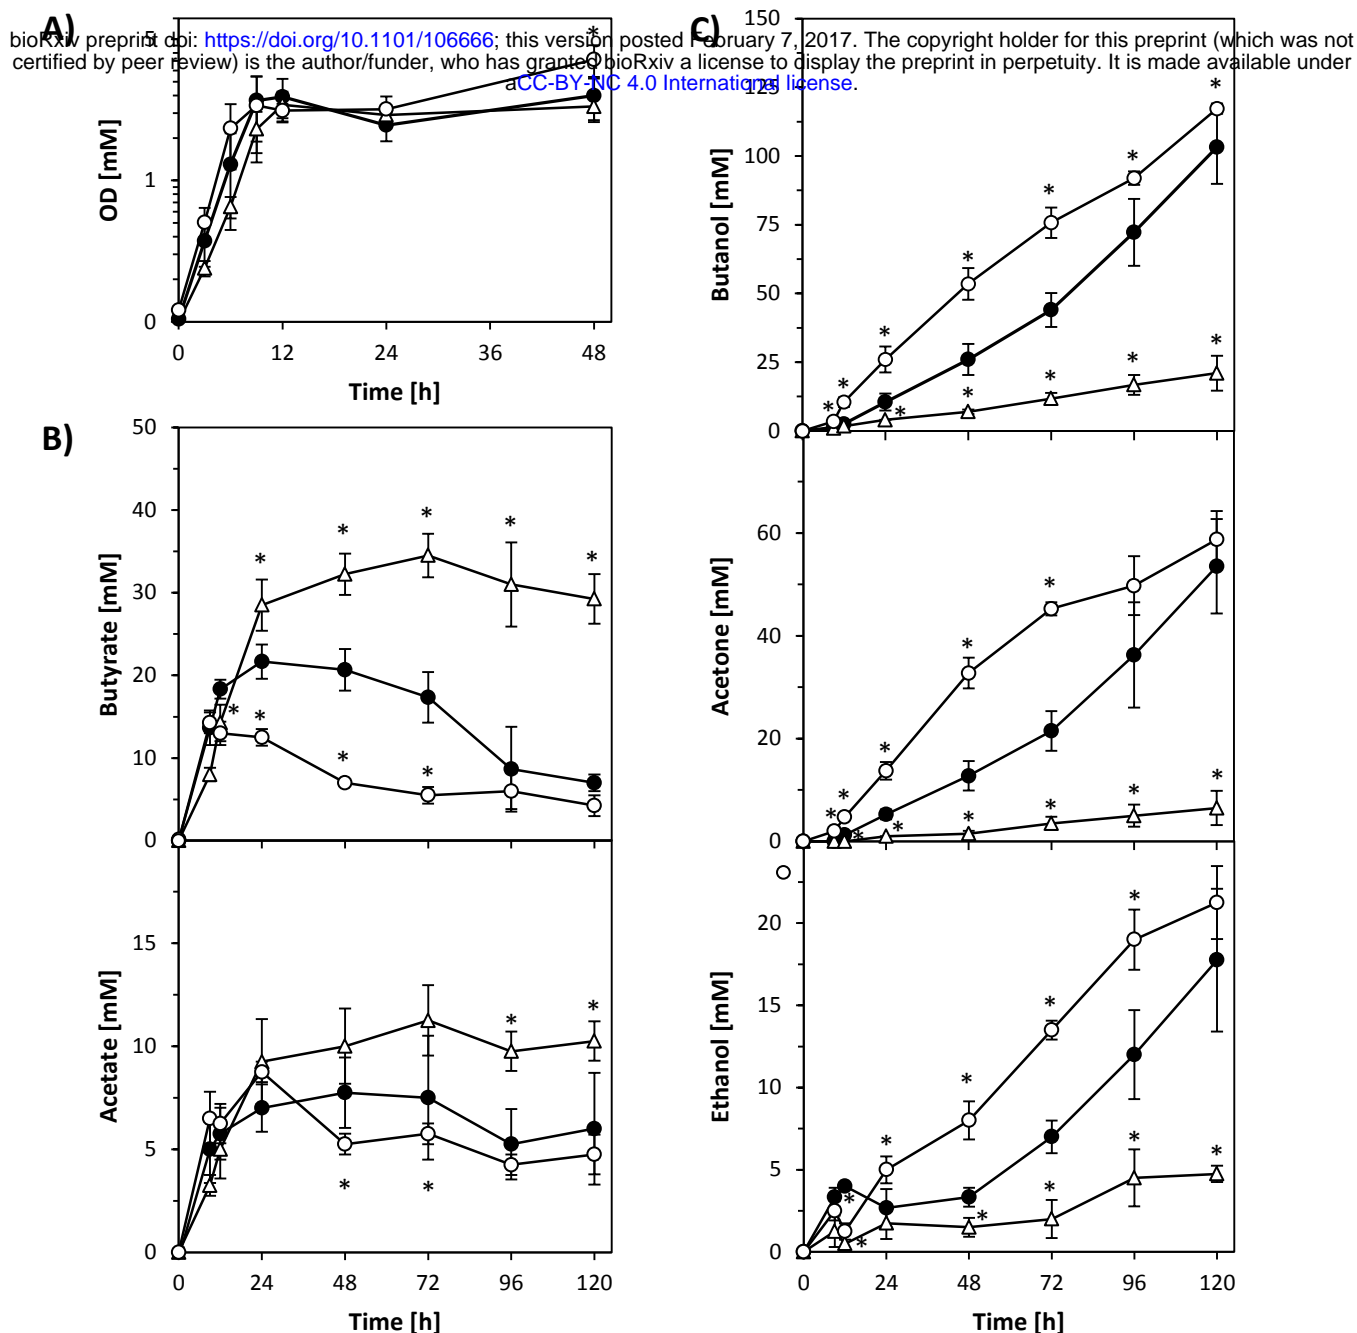

Figure 3. Fermentation profile of *C. acetobutylicum* wild type, *qsrB* mutants and genetically complemented *qsrB* mutants.

Growth (A) and production of acids (B) and solvents (C) were compared for the ATTC 824 parent strain containing the empty pMTL85141 vector (closed circles), the *qsrB* mutant containing the empty pMTL85141 vector (open circles), and the *qsrB* mutant containing the complementation plasmid pMTL85141-*qsrB* (open triangles). Data represent the mean of four independent cultures with error bars indicating the standard deviation. Significant differences ( $p \leq 0.05$ ) compared to the wildtype are indicated by an asterisk next to the relevant data point.

## Figure 4

bioRxiv preprint doi: <https://doi.org/10.1101/106666>; this version posted February 7, 2017. The copyright holder for this preprint (which was not certified by peer review) is the author/funder, who has granted bioRxiv a license to display the preprint in perpetuity. It is made available under aCC-BY-NC 4.0 International license.

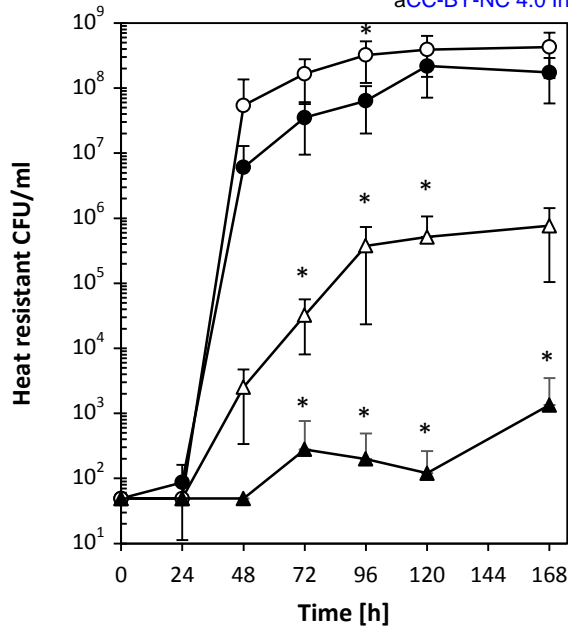

Figure 4. Effect of *qsrB* deletion and overexpression on sporulation.

The ability to sporulate was assessed for the ATTC 824 parent strain containing the empty pMTL85141 vector (closed circles), the *qsrB* mutants containing the empty pMTL85141 vector (open circles), the *qsrB* mutants containing the pMTL85141-*qsrB* complementation plasmid (open triangles), and the ATTC 824 parent strain containing the pMTL85141-*qsrB* complementation plasmid (closed triangles). Sporulation efficiencies were assessed by determining the number of heat-resistant endospores produced at the indicated time points. Data represent the mean of four independent cultures with error bars indicating the standard deviation. Only the upper half of the error bar is shown in cases where the lower half extends beyond the x axis. Significant differences ( $p \leq 0.05$ ) compared to the vector-carrying wild type and vector-carrying *qsrB* mutant are indicated by an asterisk next to the relevant data point.



Figure 5

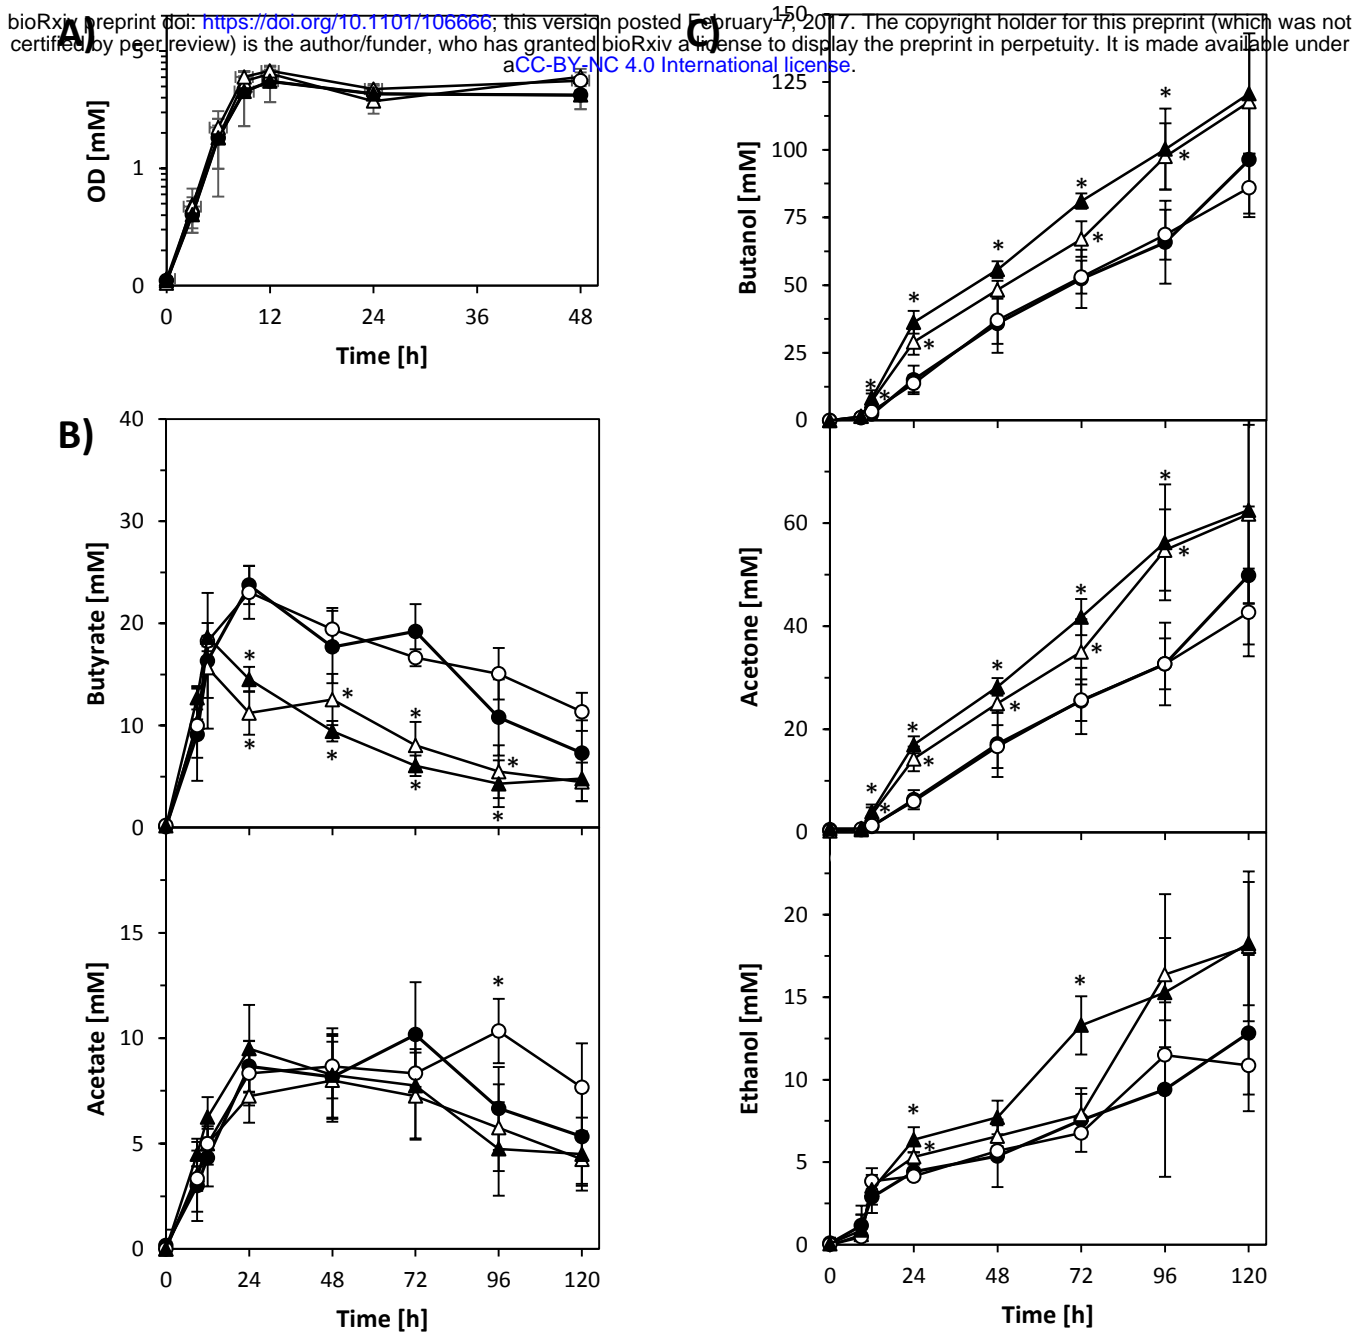

Figure 5. Fermentation profiles of *qspB*-overexpressing *C. acetobutylicum* wild type and *qspB* mutants.

Growth (A) and production of acids (B) and solvents (C) were compared for the ATCC 824 parent strain (closed symbols) and *qspB* mutant (open symbols) containing either the empty pMTL85143 vector (circles) or the overexpression plasmid pMTL85143-*qspB* (triangles). Data represent the mean of four independent cultures with error bars indicating the standard deviation. Significant differences ( $p \leq 0.05$ ) compared to the vector controls are indicated by an asterisk next to the relevant data point.

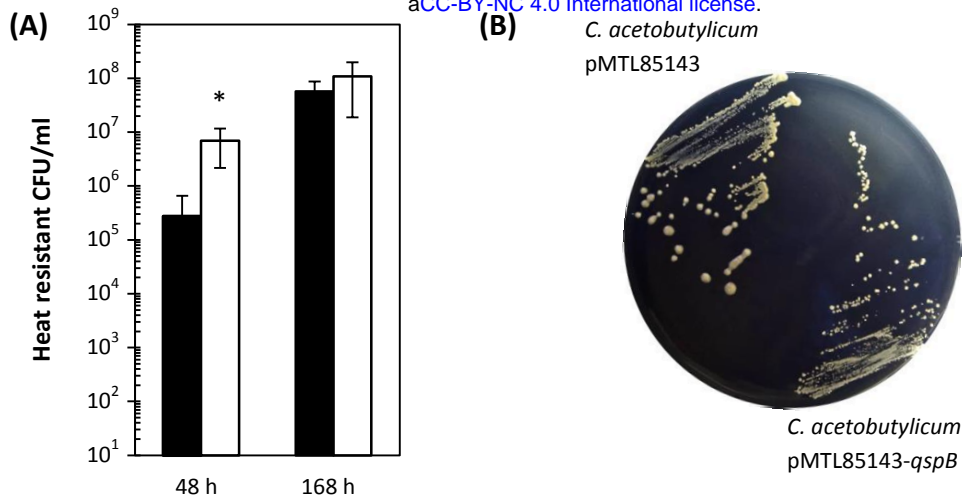

Figure 6. Effect of *qsrB* overexpression on sporulation and colony size.

(A) The ability to sporulate was assessed for the *C. acetobutylicum* ATCC 824 parent strain containing the empty pMTL85143 vector (black bars) and the overexpression plasmid pMTL85143-*qspB* (white bars). Data represent the mean of four independent cultures with error bars indicating the standard deviation. Significant differences ( $p \leq 0.05$ ) compared to the vector controls are indicated by an asterisk next to the relevant measurement. (B) 5-day old colonies of *C. acetobutylicum* carrying the empty pMTL85143 vector (left) and overexpression plasmid pMTL85143-*qspB*, respectively.

PLEASE NOTE: Figure cropped to Petri-dish shape and brightness adjusted

# Figure 7

bioRxiv preprint doi: <https://doi.org/10.1101/106666>; this version posted February 7, 2017. The copyright holder for this preprint (which was not certified by peer review) is the author/funder, who has granted bioRxiv a license to display the preprint in perpetuity. It is made available under aCC-BY-NC 4.0 International license.

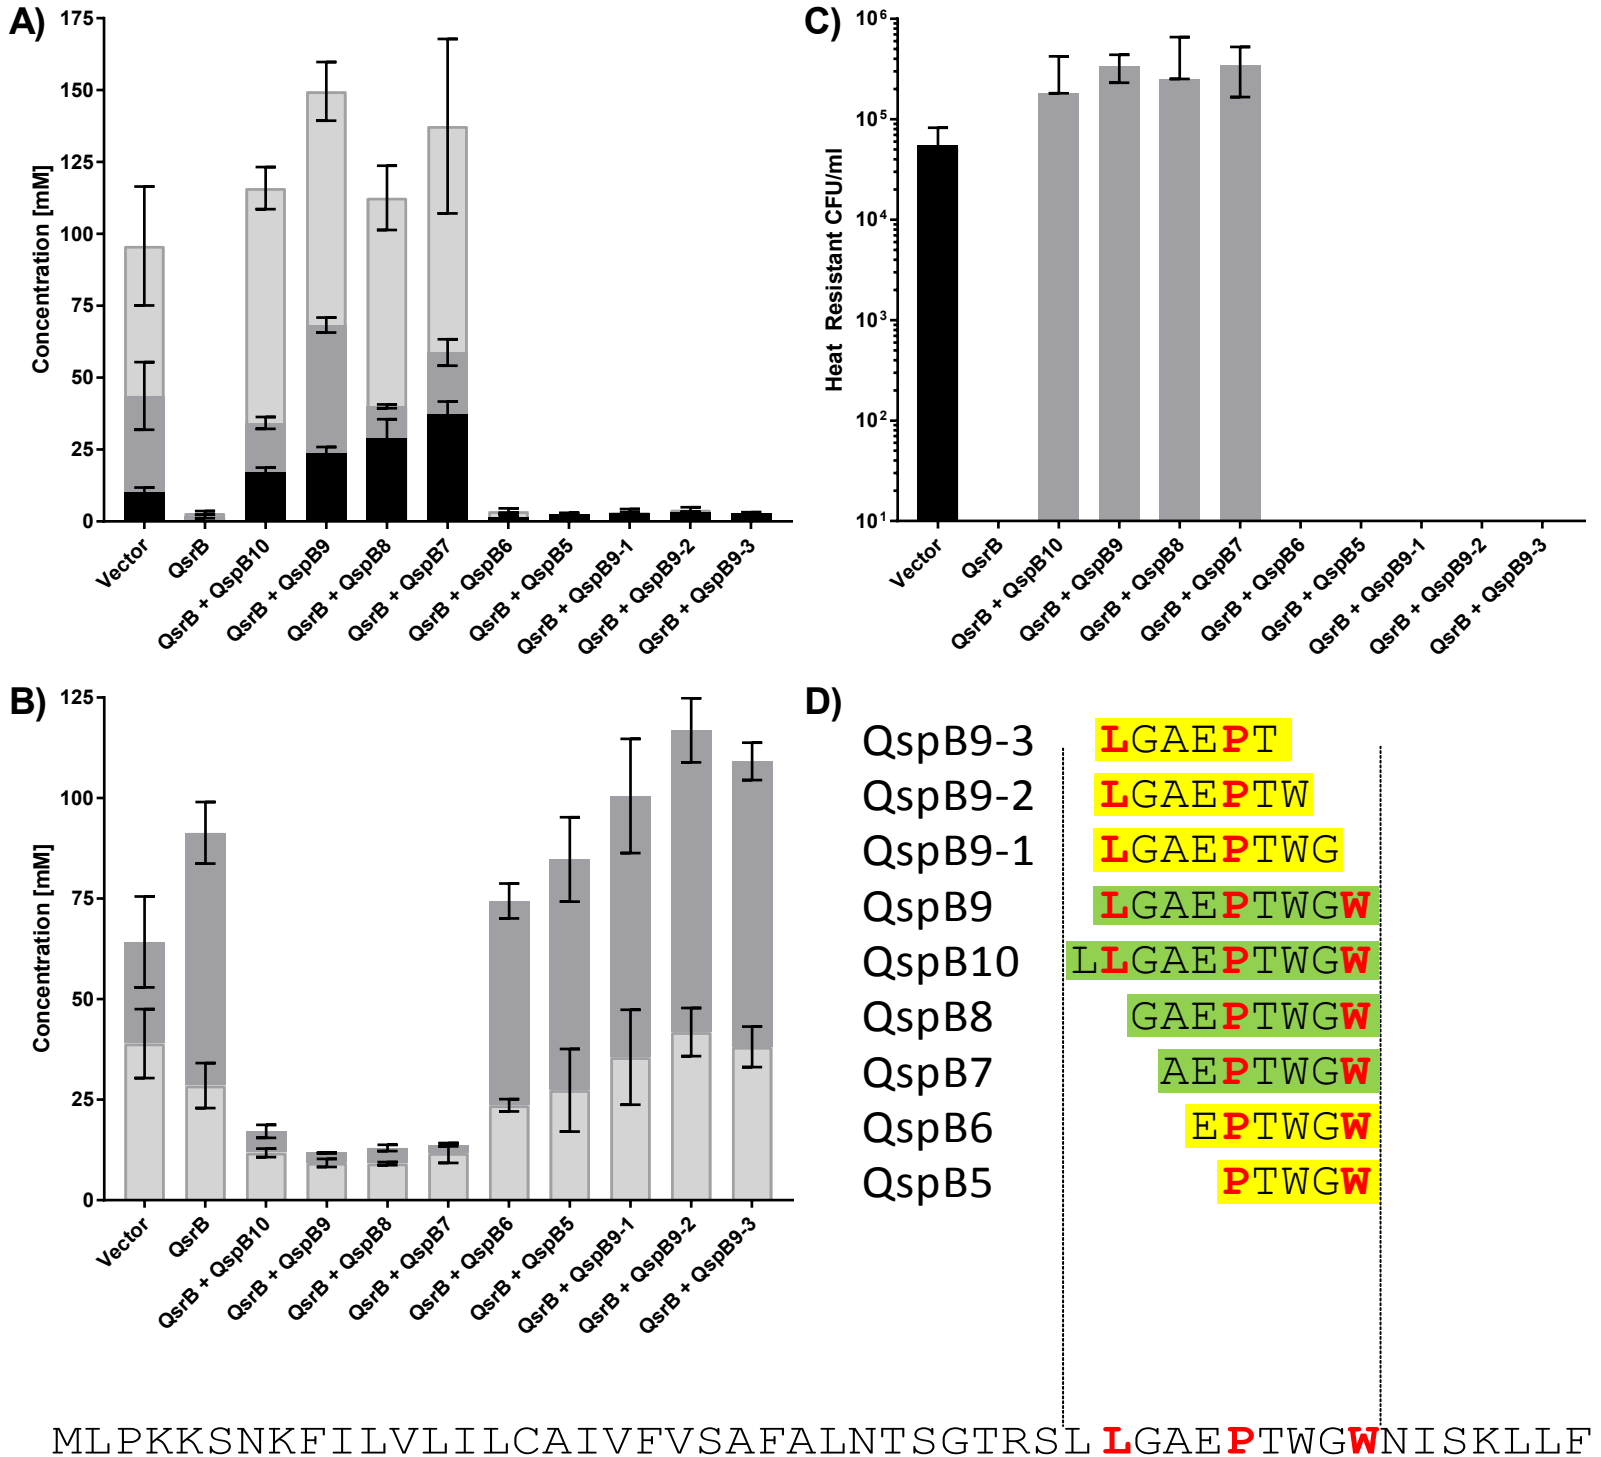

Figure 7. Synthetic peptides alleviate qsrB-mediated repression of solvent formation and sporulation. (A) Solvent titres: butanol (light grey), acetone (dark grey), ethanol (black). (B) Acid titres: butyrate (dark grey), acetate (light grey). (C) Spore titres (heat-resistant CFU). Synthetic peptides (D) were dissolved in DMSO and individually added to cultures of *C. acetobutylicum* pMTL85143-qsrB after 4 h of growth to a final concentration of 10  $\mu$ M. DMSO-only controls were performed for *C. acetobutylicum* pMTL85143 and *C. acetobutylicum* pMTL85143-qsrB, respectively. Cultures were grown for 5 days prior to analysis. *C. acetobutylicum* pMTL85143 vector control (Vector); *C. acetobutylicum* pMTL85143-qsrB cultures (QsrB). Presence of specific synthetic peptides as shown in (D) is indicated (+ QspB). The complete QspB sequence is given at the bottom with the three conserved amino acid positions in the C-terminal region (leucine, proline, tryptophan) indicated by bold red lettering. Data represent the mean of three independent cultures with error bars indicating the standard deviation.

**TABLE S** Error! No text of specified style in document. Formation of heat resistant endospores by *qsr* mutants

| Strain                                | Heat-resistant CFU/ml | p <sup>1</sup> |
|---------------------------------------|-----------------------|----------------|
| <i>C. acetobutylicum qsrA::CTermB</i> | $9.50 \times 10^7$    | 0.561          |
| <i>C. acetobutylicum qsrB::CTermB</i> | $1.18 \times 10^8$    | 0.929          |
| <i>C. acetobutylicum qsrC::CTermB</i> | $7.57 \times 10^7$    | 0.323          |
| <i>C. acetobutylicum qsrD::CTermB</i> | $8.91 \times 10^7$    | 0.473          |
| <i>C. acetobutylicum qsrE::CTermB</i> | $1.26 \times 10^8$    | 0.743          |
| <i>C. acetobutylicum qsrF::CTermB</i> | $8.22 \times 10^7$    | 0.339          |
| <i>C. acetobutylicum qsrG::CTermB</i> | $3.85 \times 10^7$    | *0.036         |
| <i>C. acetobutylicum qsrH::CTermB</i> | $1.21 \times 10^8$    | 0.857          |
| <i>C. acetobutylicum</i> ATCC 824     | $1.15 \times 10^8$    | -              |

<sup>1</sup>Significant differences to the wildtype are indicated by an asterisk.

**Table S2. Bacterial strains used in this study**

| <b>Strain</b>                                                        | <b>Relevant properties</b>                                                                                                                                                                                          | <b>Source/reference</b>                                        |
|----------------------------------------------------------------------|---------------------------------------------------------------------------------------------------------------------------------------------------------------------------------------------------------------------|----------------------------------------------------------------|
| <i>E. coli</i> Top10                                                 | F- <i>mcrA</i> $\Delta$ ( <i>mrr-hsdRMS-mcrBC</i> )<br>$\Phi$ 80 <i>lacZ</i> $\Delta$ M15 $\Delta$ <i>lacX74 recA1</i><br><i>araD139</i> $\Delta$ ( <i>ara leu</i> )7697 <i>galU galK rpsL</i> (StrR) endA1<br>nupG | Invitrogen                                                     |
| <i>E. coli</i> Top 10 pAN2                                           | <i>E. coli</i> Top 10 with methylation plasmid pAN2<br>containing the $\phi$ 3TI methyltransferase                                                                                                                  | Heap et al. (2007)                                             |
| <i>C. acetobutylicum</i> ATCC 824                                    | <i>C. acetobutylicum</i> ATCC 824 wild type                                                                                                                                                                         | Prof. Hubert Bahl,<br>University of Rostock<br>(COSMIC-strain) |
| <i>C. acetobutylicum</i> <i>qsrA</i> ::CTermB                        | <i>C. acetobutylicum</i> ATCC 824 <i>qsrA</i> ClosTron mutant                                                                                                                                                       | This work                                                      |
| <i>C. acetobutylicum</i> <i>qsrB</i> ::CTermB                        | <i>C. acetobutylicum</i> ATCC 824 <i>qsrB</i> ClosTron mutant                                                                                                                                                       | This work                                                      |
| <i>C. acetobutylicum</i> <i>qsrC</i> ::CTermB                        | <i>C. acetobutylicum</i> ATCC 824 <i>qsrC</i> ClosTron mutant                                                                                                                                                       | This work                                                      |
| <i>C. acetobutylicum</i> <i>qsrD</i> ::CTermB                        | <i>C. acetobutylicum</i> ATCC 824 <i>qsrD</i> ClosTron mutant                                                                                                                                                       | This work                                                      |
| <i>C. acetobutylicum</i> <i>qsrE</i> ::CTermB                        | <i>C. acetobutylicum</i> ATCC 824 <i>qsrE</i> ClosTron mutant                                                                                                                                                       | This work                                                      |
| <i>C. acetobutylicum</i> <i>qsrF</i> ::CTermB                        | <i>C. acetobutylicum</i> ATCC 824 <i>qsrF</i> ClosTron mutant                                                                                                                                                       | This work                                                      |
| <i>C. acetobutylicum</i> <i>qsrG</i> ::CTermB                        | <i>C. acetobutylicum</i> ATCC 824 <i>qsrG</i> ClosTron mutant                                                                                                                                                       | This work                                                      |
| <i>C. acetobutylicum</i> <i>qsrH</i> ::CTermB                        | <i>C. acetobutylicum</i> ATCC 824 <i>qsrH</i> ClosTron mutant                                                                                                                                                       | This work                                                      |
| <i>C. acetobutylicum</i> <i>qspB</i> ::CTermB                        | <i>C. acetobutylicum</i> ATCC 824 <i>qspB</i> ClosTron mutant                                                                                                                                                       | This work                                                      |
| <i>C. acetobutylicum</i> pMTL85141                                   | ATTC 824 wild type with empty pMTL85141 vector                                                                                                                                                                      | This work                                                      |
| <i>C. acetobutylicum</i> pMTL85143                                   | ATTC 824 wild type with empty pMTL85143 vector                                                                                                                                                                      | This work                                                      |
| <i>C. acetobutylicum</i> <i>qsrB</i> ::CTermB pMTL85141              | <i>qsrB</i> mutant with empty ATTC 824 wild type with<br>empty pMTL85141 vector                                                                                                                                     | This work                                                      |
| <i>C. acetobutylicum</i> <i>qsrB</i> ::CTermB pMTL85141- <i>qsrB</i> | Complemented <i>qsrB</i> mutant carrying pMTL85141- <i>qsrB</i>                                                                                                                                                     | This work                                                      |
| <i>C. acetobutylicum</i> <i>qsrB</i> ::CTermB pMTL85143              | <i>qsrB</i> mutant with empty pMTL85143 vector                                                                                                                                                                      | This work                                                      |
| <i>C. acetobutylicum</i> <i>qsrB</i> ::CTermB pMTL85143- <i>qsrB</i> | Complemented <i>qsrB</i> mutant carrying pMTL85143- <i>qsrB</i>                                                                                                                                                     | This work                                                      |
| <i>C. acetobutylicum</i> pMTL85141- <i>qsrB</i>                      | <i>qsrB</i> overexpressing ATTC 824 wild type carrying<br>pMTL85141- <i>qsrB</i>                                                                                                                                    | This work                                                      |
| <i>C. acetobutylicum</i> pMTL85141- <i>qsrB</i>                      | <i>qsrB</i> overexpressing ATTC 824 wild type carrying<br>pMTL85143- <i>qsrB</i>                                                                                                                                    | This work                                                      |
| <i>C. acetobutylicum</i> <i>qspB</i> ::CTermB pMTL85143              | <i>qspB</i> mutant with empty plasmid                                                                                                                                                                               | This work                                                      |
| <i>C. acetobutylicum</i> <i>qspB</i> ::CTermB pMTL85143- <i>qspB</i> | Complemented <i>qspB</i> mutant                                                                                                                                                                                     | This work                                                      |
| <i>C. acetobutylicum</i> pMTL85143- <i>qspB</i>                      | <i>qspB</i> overexpressing ATTC 824 wild type carrying<br>pMTL85143- <i>qspB</i>                                                                                                                                    | This work                                                      |

**Table S3.** Plasmids used in this study<sup>a</sup>CC-BY-NC 4.0 International license.

| Plasmid                             | Relevant properties                                                                            | Source                             |
|-------------------------------------|------------------------------------------------------------------------------------------------|------------------------------------|
| pAN2                                | Plasmid containing $\phi$ 3TI methyltransferase                                                | Heap et al. (2007)                 |
| pCR2.1-TOPO                         | A plasmid that is supplied linearized with A-overhangs for convenient cloning of PCR fragments | Invitrogen                         |
| pMTL007C-E2:: <i>qsrA</i> -102 103A | Clostron plasmid retargeted to <i>qsrA</i> <sup>1</sup>                                        | This study                         |
| pMTL007C-E2:: <i>qsrB</i> -102 103S | Clostron plasmid retargeted to <i>qsrB</i> <sup>1</sup>                                        | This study                         |
| pMTL007C-E2:: <i>qsrC</i> -102 103S | Clostron plasmid retargeted to <i>qsrC</i> <sup>1</sup>                                        | This study                         |
| pMTL007C-E2:: <i>qsrD</i> -49 50A   | Clostron plasmid retargeted to <i>qsrD</i> <sup>1</sup>                                        | This study                         |
| pMTL007C-E2:: <i>qsrES</i> -58 59A  | Clostron plasmid retargeted to <i>qsrE</i> <sup>1</sup>                                        | This study                         |
| pMTL007C-E2:: <i>qsrF</i> -107 108A | Clostron plasmid retargeted to <i>qsrF</i> <sup>1</sup>                                        | This study                         |
| pMTL007C-E2:: <i>qsrG</i> -93 94A   | Clostron plasmid retargeted to <i>qsrG</i> <sup>1</sup>                                        | This study                         |
| pMTL007C-E2:: <i>qsrH</i> -58 59A   | Clostron plasmid retargeted to <i>qsrH</i> <sup>1</sup>                                        | This study                         |
| pMTL007C-E2:: <i>qspB</i> -53/54A   | Clostron plasmid retargeted to <i>qspB</i> <sup>1</sup>                                        | This study                         |
| pMTL85141                           | Clostridium modular plasmid containing <i>catP</i>                                             | Heap et al. (2009)                 |
| pMTL85143                           | pMTL85141 with <i>C. sporogenes</i> ferredoxin promoter upstream of multiple cloning site      | Dr Ying Zhang, Univ. of Nottingham |
| pMTL85141- <i>qsrB</i>              | pMTL85141 containing <i>qsrB</i> coding region and 351 bp non-coding region upstream           | This study                         |
| pMTL85143- <i>qsrB</i>              | pMTL85143 containing <i>qsrB</i> coding region                                                 | This study                         |
| pMTL85143- <i>qspB</i>              | pMTL85143 containing <i>qspB</i> coding region                                                 | This study                         |

<sup>1</sup>Numbers following the gene name indicate the predicted insertion site of the encoded Clostron derivative, with S and A denoting sense and anti-sense orientation, respectively.

**Table S4. Oligonucleotides used in this study**

| Oligonucleotide                       | Sequence (5' to 3')                                        |
|---------------------------------------|------------------------------------------------------------|
| <b>ClosTron mutant screening</b>      |                                                            |
| QsrA_F                                | AAGAGGAATTAGCGGGAGCTGAG                                    |
| QsrA_R                                | CGACTTCTGTCAATTTGGTTGAGAAGC                                |
| QsrB_F                                | CGATATTGTTGGAGAAGAAGTTACTC                                 |
| QsrB_R                                | AGATAATCCGCAGTTACATCC                                      |
| QsrC_F                                | TCAAATACTGCCTATTGGCGTAAAGC                                 |
| QsrC_R                                | AGCATTATTTCTGCTGCATGTCTAG                                  |
| QsrD_F                                | GGAGAGTTTTGTCATATGTGTGTC                                   |
| QsrD_R                                | AGCTTGTGATTCCTCATCCTC                                      |
| QsrE_F                                | GATAAGGGAGAAAAGTGCTATGGCAAG                                |
| QsrE_R                                | TCCTCTTGAAAAGGCATCTCTCTT                                   |
| QsrF_F                                | AGATGATATTGTAGGTACAGAACTCAC                                |
| QsrF_R                                | GTCCTGTATGTATGAGGCGATC                                     |
| QsrG_F                                | ACGGCCTAAGTCAAGAAGATCTGG                                   |
| QsrG_R                                | ATTGCTTGCGATTTCTCATCTCCATC                                 |
| QsrH_F                                | GCACTTATGAGATAATGTCTATTGGAGACAAGC                          |
| QsrH_R                                | TGCTGCACTTCTAGTAAGGTTTGCT                                  |
| EBS universal                         | CGAAATTAGAAACTTGC GTTCAGTAAAC                              |
| <b>Cloning</b>                        |                                                            |
| QsrB_C_F1                             | TATATACCTGCAGGCTACACTCAAAAGCATATAAATACG                    |
| QsrB_C_R1                             | TATATAGCGGCCGCTTACTTAACTTTATTAATAAATTTAATATTTATCT<br>ATGTC |
| QsrB_C_F2                             | CTTGGTCATATGGGAAACTGTC                                     |
| QsrB_C_R2                             | AACATCGGATCCTATTTACTTACTTAAAC                              |
| QspB_C_F1                             | TGTCTACATATGTTACCAAAAAAGAGTAATAAATTTATATTAG                |
| QspB_C_R1                             | TTTTTAGAATTCGGTTTTTTGTTAATGTTATAAAAC                       |
| <b>Southern Blot probe generation</b> |                                                            |
| EBS2                                  | TGAACGCAAGTTTCTAATTTTCGGTTCTCATCCGATAGAGGAAAGTGTCT         |
| Intron Sall-R1                        | ATTACTGTGACTGGTTTGCACCAACCCTCTTCG                          |

## Figure S1

A)

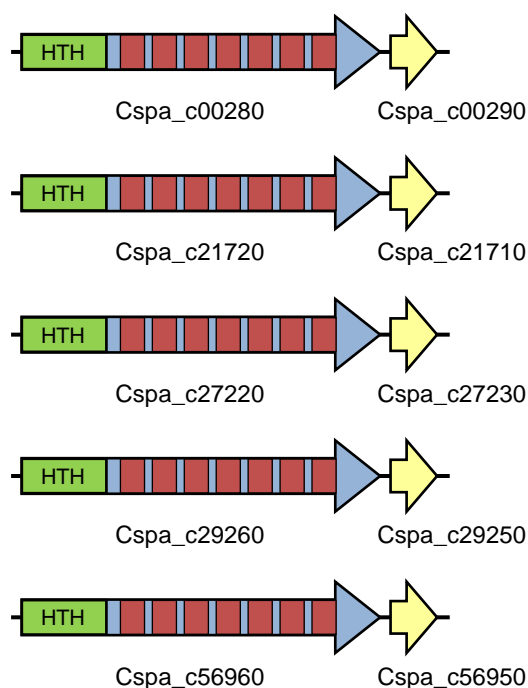

B)

|                    | positively charged                                                                                                                                                                   | hydrophobic | predicted mature signalling peptide |    |
|--------------------|--------------------------------------------------------------------------------------------------------------------------------------------------------------------------------------|-------------|-------------------------------------|----|
| <b>Cspa_c29250</b> | M <b>KKK</b> L <b>I</b> K <b>GV</b> --SLFLSC--FALTLVLNATTA---- <b>KT</b> NNSNPA <b>KV</b> H <b>LD</b> ESA <b>P</b> W <b>G</b> --                                                     |             | .....                               | 46 |
| <b>Cspa_c27230</b> | M <b>KK</b> LLLLTMVACVLLSNVAF <b>AAT</b> <b>K</b> TTSTTT <b>D</b> T <b>K</b> STITS--SSG <b>E</b> K <b>F</b> H <b>LD</b> SR <b>D</b> P <b>D</b> GW                                    |             |                                     | 54 |
| <b>Cspa_c00290</b> | M <b>KK</b> IILAVIATSMLLT <b>N</b> VAF <b>A</b> ST <b>K</b> TT <b>H</b> <b>K</b> NT----NST <b>K</b> V <b>T</b> Q <b>N</b> NV <b>S</b> VNS <b>I</b> D <b>P</b> H--                    |             |                                     | 49 |
| <b>Cspa_c21710</b> | M <b>KK</b> IILAVMAT <b>S</b> MLLT <b>N</b> VAF <b>A</b> ST <b>K</b> TT <b>H</b> T <b>K</b> I <b>T</b> <b>K</b> NSTVSS <b>V</b> D <b>P</b> NNVYHLN <b>T</b> L <b>D</b> P <b>N</b> -- |             |                                     | 53 |
| <b>Cspa_c56950</b> | M <b>KK</b> IILAVIATSMLLT <b>N</b> VAF <b>A</b> ST <b>K</b> TT <b>H</b> T <b>N</b> T <b>G</b> K <b>N</b> TTVSS <b>V</b> <b>K</b> QNSMYHLN <b>T</b> T <b>D</b> P <b>Y</b> --          |             |                                     | 53 |
|                    | *** :: : ::* : ** * . . . . .                                                                                                                                                        |             | :: : *                              |    |

Figure S1. Schematic representation of *C. saccharoperbutylacetonicum* RNPP quorum sensing gene clusters (A) and alignment of putative signalling peptide precursor sequences (B).

(A) Four RNPP quorum sensing gene clusters have been identified, each encoding an RNPP-type regulator (large arrows) and a signalling peptide precursor (short yellow arrows). The locus tags for each system are provided. Regions encoding a helix-turn-helix motif (HTH, green) and tetratricopeptide repeat domains (red) are indicated. (B) The Clustal Omega amino acid sequence alignment shows the four predicted Qsp proteins. A conserved proline in the C-terminal region is indicated with red font; blue and green fonts indicate positively (K, R) and negatively charged (D, E) amino acids, respectively. Identical (\*), conserved (:), and semi-conserved substitutions (.) are shown. Numbers indicate the length of the different precursor proteins. Positively charged, hydrophobic, and predicted signalling peptide-encoding regions are indicated with blue, grey, and red lines, respectively.



## Figure S2

bioRxiv preprint doi: <https://doi.org/10.1101/106666>; this version posted February 7, 2017. The copyright holder for this preprint (which was not certified by peer review) is the author/funder, who has granted bioRxiv a license to display the preprint in perpetuity. It is made available under aCC-BY-NC 4.0 International license.

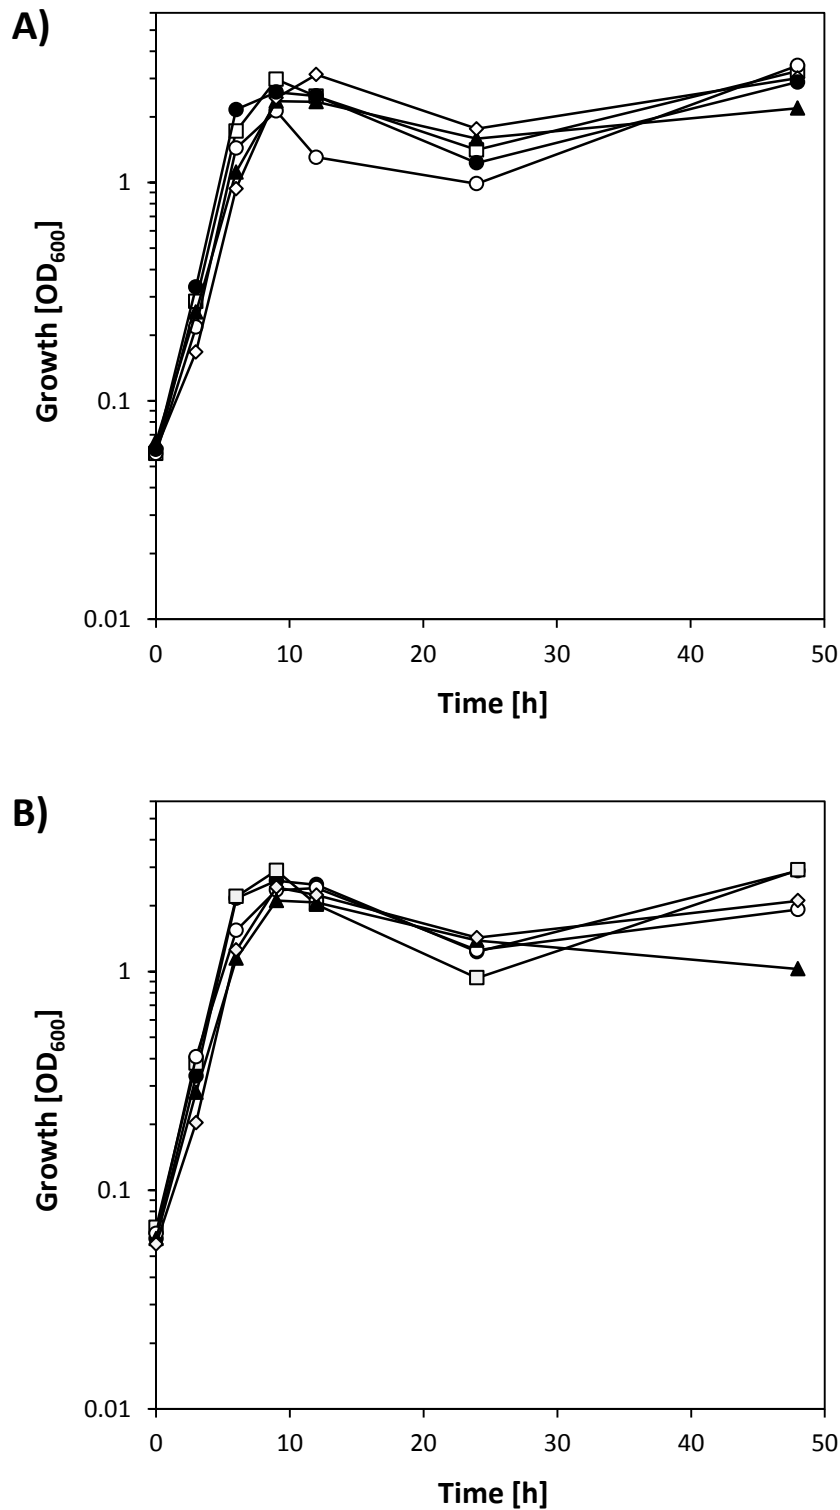

Figure S2. Growth of *C. acetobutylicum* ATCC 824 and derived *qsr* mutants in CBM-S medium.

The data represent the mean of three independently cultures. A) Wildtype (closed circles); *qsrA* (open squares), *qsrB* (open circles), *qsrC* (closed triangles) and *qsrD* (open diamonds) mutants. B) Wildtype (closed circles); *qsrE* (open squares), *qsrF* (open circles), *qsrG* (closed triangles) and *qsrH* (open diamonds) mutants.

## Figure S3

bioRxiv preprint doi: <https://doi.org/10.1101/106666>; this version posted February 7, 2017. The copyright holder for this preprint (which was not certified by peer review) is the author/funder, who has granted bioRxiv a license to display the preprint in perpetuity. It is made available under aCC-BY-NC 4.0 International license.

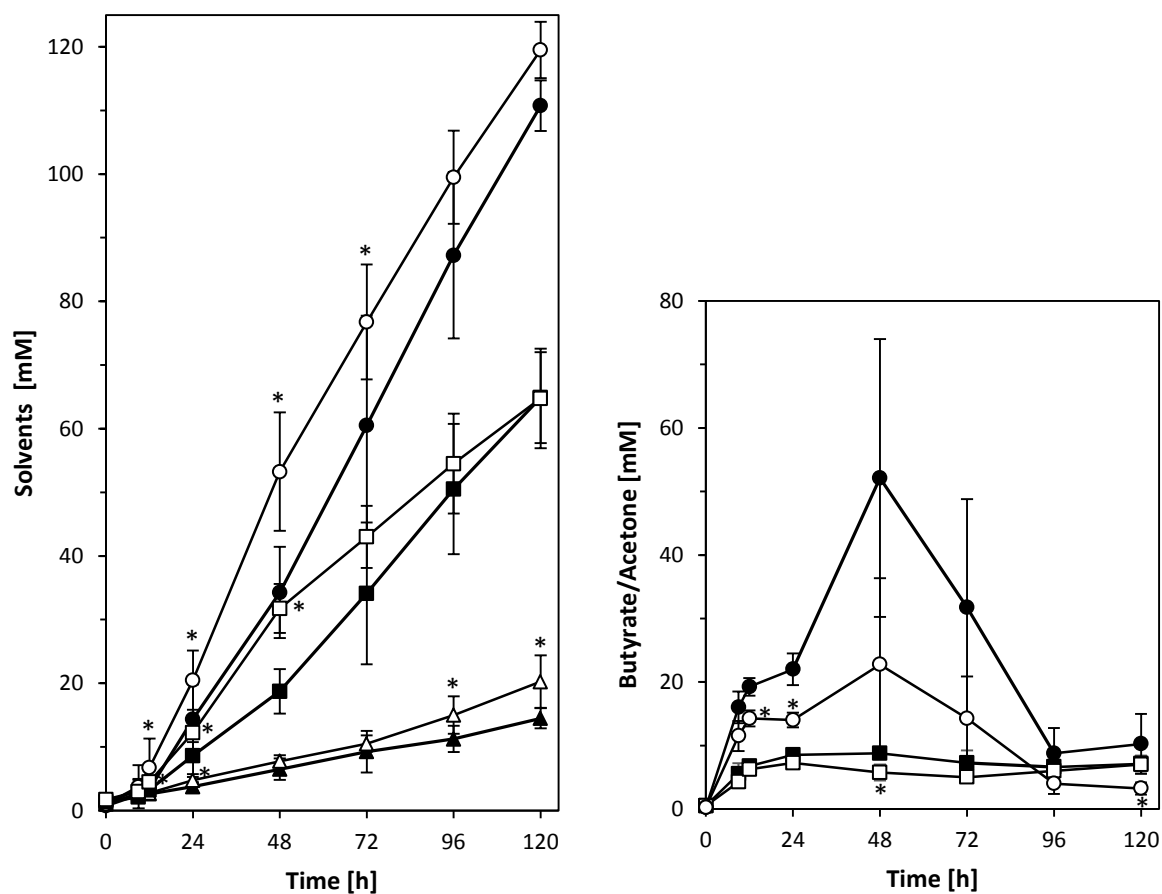

Figure S3. Solvent and acid production by *C. acetobutylicum* *qsrB* mutants

(A) Concentration of butanol (circles), acetone (squares) and ethanol (triangles) in the culture supernatant at the indicated time points. Open and closed symbols represent *qsrB* mutant and ATTC 824 parent strain data, respectively. (B) Concentration of butyrate (circles) and acetate (squares) in the culture supernatant at the indicated time point. Open and closed symbols represent *qsrB* mutant and ATTC 824 parent strain data, respectively. Data represent the mean of three independent cultures with error bars indicating the standard deviation. Significant differences ( $p \leq 0.05$ ) compared to the wildtype are indicated by an asterisk next to the relevant data point.

## Figure S4

|                                                              | Peptide activity |
|--------------------------------------------------------------|------------------|
| MLPKKSNKFILVLLILCAIVFVSAFALNTSGTRSL <b>LGAEPTWGW</b> NISKLLF |                  |
| TRSL <b>LGAEPTWGW</b> NISKLLF                                | ++               |
| SL <b>LGAEPTWGW</b> NISKLLF                                  | +++              |
| <b>LGAEPTWGW</b> NISKLLF                                     | ++               |
| AE <b>PTWGW</b> NISKLLF                                      | ++               |
| <b>PTWGW</b> NISKLLF                                         | -                |
| AE <b>PTWGW</b>                                              | +++              |
| <b>LGAEPTWGW</b>                                             | +++              |
| SL <b>LGAEPTWGW</b>                                          | +++              |
| TRSL <b>LGAEPTWGW</b>                                        | +++              |
| SL <b>LGAE</b>                                               | -                |
| TRSL <b>LGAE</b>                                             | -                |
| SGTRSL <b>LGAE</b>                                           | -                |
| NISKLLF                                                      | -                |

Figure S4. Synthetic peptides alleviate *qsrB*-mediated repression of solvent formation.

The indicated synthetic peptides dissolved in DMSO were added to cultures of *C. acetobutylicum* pMTL85141-*qsrB* after 4 h of growth to a final concentration of 10  $\mu$ M. Equivalent DMSO controls were performed for *C. acetobutylicum* pMTL85141 and *C. acetobutylicum* pMTL85141-*qsrB*, respectively. Triplicate cultures were grown for 5 days and analysed for final butanol titres. The ability to overcome *qsrB*-mediated repression of butanol formation was scored in comparison to the DMSO controls as follows: -, no significant difference to the *C. acetobutylicum* pMTL85141-*qsrB* DMSO control; ++, final butanol levels 40-66% of the *C. acetobutylicum* pMTL85141 DMSO control; +++, final butanol levels 67-100% of the *C. acetobutylicum* pMTL85141 DMSO control. *C. acetobutylicum* pMTL85141-*qsrB* DMSO and *C. acetobutylicum* pMTL85141 DMSO controls produced 14 $\pm$ 8 mM and 123 $\pm$ 17 mM of butanol, respectively. The complete QspB sequence is given at the top with the three conserved amino acid positions (leucine, proline, tryptophan) in the C-terminal region indicated by bold red lettering.
